# Supplementary material
Source: ML conference proceedings conference paper supplement (https://openreview.net/forum?id=7p5YWe8GqG)
Supplement: supplementary_material [file attachment]

## Summary of Appendix

We first provide code and discuss reproducibility in Section A. We present dataset details in Section B, method details in Section C, analysis and discussions in Section D, implementation and training details in Section E and extra experiment results in Section F.

### A Code and Reproducibility

We provide an anonymous code in the supplementary material. We set the random seed as 2022 for all experiments to enable reproducible results. We provide dataset statistics in Table 5 and details for the proposed graph theory benchmark in Appendix B.2. Details of the hyper-parameters are reported in Table 8. Configuration of all hyper-parameters and the command lines to reproduce the experiments have been included in the code repository.

### B Dataset Details

#### B.1 Dataset Statistics and Metrics

We provide the statistics of all datasets used in our experiments in Table 5 and introduce the evaluation metrics for each dataset.

For Synthetic datasets, we use classification accuracy (ACC) as the evaluation metric. We use Mean Square Error (MSE) as the evaluation metric for all datasets in our Graph Theory Benchmark. For GNN Benchmark, we follow the original work [13] for evaluation, i.e., Mean Absolute Error (MAE) for ZINC and AQSOL, classification accuracy for MNIST and CIFAR10, and balanced classification accuracy for PATTERN and CLUSTER. For OGB Benchmark, we follow the original work [26] and use the ROC-AUC for classification tasks and Root Mean Square Error (RMSE) for regression tasks. For TU datasets, we follow the setting used by [9] and use classification accuracy as the evaluation metric.

#### B.2 Graph Theory Benchmark

In this section, we provide the details about the tasks and how the graph features and the labels are generated given a base graph  $\mathcal{G} = (\mathcal{V}, \mathcal{E})$ :

- Single source single destination shortest path ( $\text{SP}_{\text{sssd}}$ ): a source node  $s \in \mathcal{V}$  and a destination node  $t \in \mathcal{V}$  are selected uniform randomly. The feature of each node  $v$  contains three numbers: (1, whether the node  $v$  is  $s$ , whether the node  $v$  is  $t$ ). The label of a graph is the length of the shortest path from  $s$  to  $t$ .
- A maximum connected component of the same color (MCC): each node of the graph is colored with one of three colors. The feature for each node is the one-hot representation of its color. The label of graph is the size of the largest connected component of the same color for each color.
- Graph diameter (Diameter): the label of the graph is the diameter of the graph. The diameter of a graph  $\mathcal{G}$  is the maximum of the set of shortest path distances between all pairs of nodes in the graph. The feature of each node is a uniform number 1.
- Single source shortest path ( $\text{SP}_{\text{ss}}$ ): a source node  $s$  is selected uniformly randomly. The feature of each node contains two numbers: (1, whether the node is  $s$ ). The label of each node is the length of the shortest path from  $s$  to this node.
- Graph eccentricity (ECC): the label of each node  $v$  is node’s eccentricity in the graph, which is the maximum distance from  $v$  to the other nodes. The feature of each node is a uniform number 1.

For each task and graph generation method, We generate the dataset by the following steps:

- Sample  $N$  (number of nodes) from  $[20, 50]$ , totally 300 graphs. These numbers can be configured.

Table 5: The statistics of the datasets used in experiments. Some statistics (like the average number of edges) of the Graph Theory datasets may vary depending on different random graph generation methods. The regression tasks are marked with  $\checkmark$  in a separate column. The tasks of 4 synthetic datasets are transductive, where the same graph is used for both training and testing. We do not use the node labels as features during the training time. The train-val-test split is over nodes. All other datasets in the table are inductive, where the testing graphs do not occur during training, and the train-val-test split is over graphs.

| Collection   | Dataset            | #<br>Graphs | Avg<br>#<br>Nodes | Avg<br>#<br>Edges | #<br>Node<br>Feat | #<br>Edge<br>Feat | #<br>Classes | Task       | Reg.         |
|--------------|--------------------|-------------|-------------------|-------------------|-------------------|-------------------|--------------|------------|--------------|
| Synthetic    | BaShape            | 1           | 700               | 1761              | 1                 | -                 | 4            | Trans-Node |              |
| Synthetic    | BaCommunity        | 1           | 1400              | 3872              | 10                | -                 | 8            | Trans-Node |              |
| Synthetic    | TreeCycle          | 1           | 871               | 970               | 1                 | -                 | 2            | Trans-Node |              |
| Synthetic    | TreeGrid           | 1           | 1231              | 1705              | 1                 | -                 | 2            | Trans-Node |              |
| GraphTheory  | SP <sub>sssd</sub> | 300         | 35.0              | -                 | 3                 | -                 | -            | Graph      | $\checkmark$ |
| GraphTheory  | Diameter           | 300         | 35.0              | -                 | 1                 | -                 | -            | Graph      | $\checkmark$ |
| GraphTheory  | MCC                | 300         | 35.0              | -                 | 3                 | -                 | -            | Graph      | $\checkmark$ |
| GraphTheory  | SP <sub>ss</sub>   | 300         | 35.0              | -                 | 2                 | -                 | -            | Node       | $\checkmark$ |
| GraphTheory  | ECC                | 300         | 35.0              | -                 | 1                 | -                 | -            | Node       | $\checkmark$ |
| LRGB         | Peptides-func      | 15535       | 150.94            | 307.30            | 9                 | 3                 | 10           | Graph      |              |
| LRGB         | Peptides-struct    | 15535       | 150.94            | 307.30            | 9                 | 3                 | -            | Graph      | $\checkmark$ |
| GNNBenchmark | ZINC               | 12000       | 23.16             | 49.83             | 28                | 4                 | 2            | Graph      | $\checkmark$ |
| GNNBenchmark | AQSOL              | 9823        | 17.57             | 35.76             | 65                | 5                 | 2            | Graph      | $\checkmark$ |
| GNNBenchmark | MNIST              | 70000       | 70.57             | 564.53            | 3                 | 1                 | 10           | Graph      |              |
| GNNBenchmark | CIFAR10            | 60000       | 117.63            | 941.07            | 5                 | 1                 | 10           | Graph      |              |
| GNNBenchmark | PATTERN            | 14000       | 118.89            | 6078.57           | 3                 | -                 | 2            | Node       |              |
| GNNBenchmark | CLUSTER            | 12000       | 117.20            | 4301.72           | 7                 | -                 | 6            | Node       |              |
| OGB Graph    | molhiv             | 41127       | 25.51             | 80.45             | 9                 | 3                 | 2            | Graph      |              |
| OGB Graph    | molbace            | 1513        | 34.09             | 107.81            | 9                 | 3                 | 2            | Graph      |              |
| OGB Graph    | molbbbp            | 2039        | 24.06             | 75.97             | 9                 | 3                 | 2            | Graph      |              |
| OGB Graph    | molclintox         | 1477        | 26.16             | 81.93             | 9                 | 3                 | 2            | Graph      |              |
| OGB Graph    | molsider           | 1427        | 33.64             | 104.36            | 9                 | 3                 | 2            | Graph      |              |
| OGB Graph    | moltox21           | 7831        | 18.57             | 57.16             | 9                 | 3                 | 2            | Graph      |              |
| OGB Graph    | moltoxcast         | 8576        | 18.78             | 57.30             | 9                 | 3                 | 2            | Graph      |              |
| OGB Graph    | molesol            | 1128        | 13.29             | 40.64             | 9                 | 3                 | -            | Graph      | $\checkmark$ |
| OGB Graph    | molreesolv         | 642         | 8.7               | 25.50             | 9                 | 3                 | -            | Graph      | $\checkmark$ |
| OGB Graph    | mollipo            | 4200        | 27.04             | 86.04             | 9                 | 3                 | -            | Graph      | $\checkmark$ |
| TU           | MUTAG              | 188         | 17.93             | 19.79             | 7                 | -                 | 3            | Graph      |              |
| TU           | NCI1               | 4110        | 29.87             | 32.30             | 37                | -                 | 2            | Graph      |              |
| TU           | PROTEINS           | 1113        | 39.06             | 72.82             | 4                 | -                 | 2            | Graph      |              |
| TU           | D&D                | 1178        | 284.32            | 715.66            | 89                | -                 | 2            | Graph      |              |
| TU           | ENZYMES            | 600         | 32.63             | 62.14             | 21                | -                 | 6            | Graph      |              |
| TU           | IMDB-B             | 1000        | 19.77             | 96.53             | 10                | -                 | 2            | Graph      |              |
| TU           | IMDB-M             | 1500        | 13.00             | 65.94             | 10                | -                 | 3            | Graph      |              |
| TU           | RE-B               | 2000        | 429.63            | 497.75            | 10                | -                 | 2            | Graph      |              |
| TU           | RE-M5K             | 4999        | 508.52            | 594.87            | 10                | -                 | 5            | Graph      |              |
| TU           | RE-M12K            | 11929       | 391.41            | 456.89            | 10                | -                 | 11           | Graph      |              |

- Use the graph generation method to generate a graph of  $N$  nodes.
- Create graph features and labels according to the task.

We then provide the details about the random graph generation methods we used to create our Graph Theory datasets.

Following [10], we continue to use undirected and unweighted graphs from a wide variety of types. We inherit their 10 random graph generation methods and quote their descriptions here for completeness (the percentage after the name is the approximate proportion of such graphs in the mixture setting).

- **Erdős-Rényi (ER)** (20%) [16]: with a probability of presence for each edge equal to  $p$ , where  $p$  is independently generated for each graph from  $\mathcal{U}[0, 1]$
- **Barabási-Albert (BA)** (20%) [2]: the number of edges for a new node is  $k$ , which is taken randomly from  $\{1, 2, \dots, N - 1\}$  for each graph
- **Grid** (5%):  $m \times k$  2d grid graph with  $N = mk$  and  $m$  and  $k$  as close as possible
- **Caveman** (5%) [51]: with  $m$  cliques of size  $k$ , with  $m$  and  $k$  as close as possible
- **Tree** (15%): generated with a power-law degree distribution with exponent 3
- **Ladder graphs** (5%)
- **Line graphs** (5%)
- **Star graphs** (5%)
- **Caterpillar graphs** (10%): with a backbone of size  $b$  (drawn from  $\mathcal{U}[1, N]$ ), and  $N - b$  pendent vertices uniformly connected to the backbone
- **Lobster graphs** (10%): with a backbone of size  $b$  (drawn from  $\mathcal{U}[1, N]$ ),  $p$  (drawn from  $\mathcal{U}[1, N - b]$ ) pendent vertices uniformly connected to the backbone, and additional  $N - b - p$  pendent vertices uniformly connected to the previous pendent vertices.

Additional, we add three more graph generation methods:

- **Cycle graphs**
- **Pseudotree graphs**: A tree graph plus an additional edge. The graph is generated by first generating a cycle graph of size  $m = \text{sample}(0.3N, 0.6N)$ . Then  $n - m$  remaining nodes are sampled to  $m$  parts, where  $i$ -th part represents the size of the tree hanging on the  $i$ -th node on the cycle. The trees are randomly generated with the given size.
- **Geographic (Geo) graphs**: geographic threshold graphs, but with added edges via a minimum spanning tree algorithm, to ensure all nodes are connected. This graph generation method is introduced by [6] in their codebase<sup>1</sup>. We use the geographic threshold  $\theta = 200$  instead of the default value  $\theta = 1000$ .

Note that we do not have randomization after the graph generation as in [10]. Therefore, very long diameter is preserved for some type of graphs.

## C Method Details

### C.1 Cross Update Function

The cross update function  $(\mathbf{X}'_j, \hat{\mathbf{X}}'_j, \mathbf{X}'_{j+1}) = \text{X-UPD}(j, \mathbf{X}_j, \hat{\mathbf{X}}_j, \mathbf{X}_{j+1})$  perform information exchange in consecutive hierarchies.

The *X-Conv* realization contains the following steps:

1. Merge the node features of  $\mathbf{X}_j$  and  $\mathbf{X}_{j+1}$  with the inter-graph feature  $\hat{\mathbf{X}}_j$ , results in  $\bar{\mathbf{X}}_j$ .
2. Apply GN blocks on inter-graph  $\hat{\mathcal{G}}_j$ :  $\hat{\mathbf{X}}'_j = \text{GN}_{\text{inter}}^{i,j}(\hat{\mathcal{G}}_j, \bar{\mathbf{X}}_j)$ .
3. Retrieve  $\mathbf{X}'_j$  and  $\mathbf{X}'_{j+1}$  from the node features of inter-graph features  $\hat{\mathbf{X}}'_j$ .

<sup>1</sup>[https://github.com/deepmind/graph\\_nets](https://github.com/deepmind/graph_nets), the shortest path demo

## 621 C.2 S-EdgePool

622 In this subsection, we introduce the details of S-EdgePool. We first introduce the score generation  
 623 method, then give details about the SELECT, CONNECT, REDUCE and EXPAND functions, and lastly  
 624 provide pseudocode of the algorithm.

### 625 C.2.1 Edge Score Generation

Both S-EdgePool and EdgePool methods compute a raw edge score  $\mathbf{r}_k$  for each edge  $k$  using a linear layer:

$$\mathbf{r}_k = \mathbf{W} \cdot (\mathbf{V}_{s_k} \parallel \mathbf{V}_{t_k} \parallel \mathbf{E}_k) + \mathbf{b}$$

where  $s_k$  and  $t_k$  are the source and target nodes of edge  $k$ ,  $\mathbf{V}$  is node features,  $\mathbf{E}$  is edge features,  $\mathbf{W}$  and  $\mathbf{b}$  are learned parameters. The raw edge scores are further normalized by a local softmax function over all edges of a node:

$$\mathbf{w}_k = \exp(\mathbf{r}_k) / \sum_{k', t_{k'}=t_k} \exp(\mathbf{r}_{k'}),$$

626 and biased by a constant 0.5 [11].

### 627 C.2.2 Select, Connect, Reduce and Expand

628 **SELECT step.** S-EdgePool shares the same computations as in EdgePool to generate learnable edge  
 629 scores, as detailed above. Then, we use a clustering procedure to determine the subset of nodes to be  
 630 reduced.

631 Let  $I_v$  be the identifier of the cluster containing a set of nodes  $\mathbf{v}$ . Initially, we let  $\mathbf{v} = \{v\}$  for  
 632 every single node  $v$ . A contraction of an edge merges a pair of nodes  $(v, v')$  connected by this edge  
 633 (where  $v \in \mathbf{v}$ ,  $v' \in \mathbf{v}'$  and  $\mathbf{v} \neq \mathbf{v}'$ ), and thus unifies the cluster identifiers, i.e.,  $I_v = I_{v'} = I_{\mathbf{v}_{\text{merge}}}$   
 634 and  $\mathbf{v}_{\text{merge}} = \mathbf{v} \cup \mathbf{v}'$ . That is, once an edge connecting any pair of nodes from two distinct clusters  
 635 is contracted, we merge the two clusters and unify their identifiers. Edges are visited sequentially  
 636 by a decreasing order on the edge scores, and contractions are implemented if valid. We set the  
 637 maximum size of the node clusters to be a parameter  $\tau_c$ , where  $\tau_c = 2$  degenerates to the case of  
 638 EdgePool [11]. We further introduce the pooling ratio  $\eta_v$  to control the minimal number of remaining  
 639 clusters after edge contractions to be  $N^v * \eta_v$ . Contractions that violate the above two constraints  
 640 are invalid and will be skipped. Both parameters control the number of nodes in the pooled graph.  
 641 In our implementation, the cluster of nodes is dynamically maintained using the disjoint-set data  
 642 structure [19].

643 Then each node cluster  $i$  collapses into a new node  $\tilde{v}$  of the pooled graph (i.e.  $S_{\tilde{v}} = \{v | I_v = i\}$ ),  
 644 with inter-graph edges connect the nodes in the cluster to the new node  $\tilde{v}$ .

645 **CONNECT step.** The CONNECT function rebuilds the edge set  $\tilde{\mathcal{E}}$  between the nodes in  $\tilde{\mathcal{V}}$ . As aforemen-  
 646 tioned, we build the pooled graph's nodes according to node clusters. We call this mapping function  
 647 from node clusters to new nodes as  $c2n$ . After that, we build the pooled graph's edges following three  
 648 steps: First, for all edges in the original graph, we find out the corresponding node cluster(s) of its  
 649 two endpoints (using a disjoint-set's find index operation). Then, we find out the corresponding new  
 650 nodes by using the mapping function  $n$ . Last, we add a new edge between the new nodes.

651 **REDUCE and EXPAND step.** The REDUCE and EXPAND are generalized from the method mentioned in  
 652 [11]. The REDUCE function computes new node features and edge features. We follow their method  
 653 to compute new node features by taking the sum of the node features and multiplying it by the edge  
 654 score. Specifically, we generalize the computation between two nodes to a node cluster. The node  
 655 clusters are maintained with a disjoint-set data structure and a cluster  $S_{\tilde{v}}$  consists of  $|S_{\tilde{v}}|$  nodes. We  
 656 define  $\mathcal{E}_{\tilde{v}}^{ds}$  as a set of  $|S_{\tilde{v}}| - 1$  edges, where the edges are the selected edges to be contracted in the  
 657 SELECT step. Then,

$$c_{\tilde{v}} = \frac{1 + \sum_{e_k \in \mathcal{E}_{\tilde{v}}^{ds}} \mathbf{w}_k}{|S_{\tilde{v}}|}$$

$$\mathbf{V}_{\tilde{v}} = \frac{c_{\tilde{v}}}{\sum_{v \in S_{\tilde{v}}} \mathbf{V}_v}$$

658 To integrate the edge features between two node clusters, we first find all the connected edges  
 659 between the two node clusters (the edges between node clusters are edges that connect two nodes  
 660 from different node clusters). Then, we use the sum of all the connected edges' features between the  
 661 two node clusters as the new edge's features.

662 The EXPAND function is also referred as *unpool* operation. It computes node features of the input  
 663 graph  $\mathbf{V}_v$  given the node features of the pooled graph  $\mathbf{V}_{\tilde{v}}$  as following:

$$\mathbf{V}_v = \frac{\mathbf{V}_{\tilde{v}}}{c_{\tilde{v}}}$$

### 664 C.2.3 Pseudo Code

665 The pseudo-code includes two parts, where Algorithm 1 describes how to maintain the clusters using  
 666 a disjoint-set data structure, and Algorithm 2 describes the procedure of S-EdgePool that generates a  
 667 pooled graph  $\tilde{\mathcal{G}}$  with configurable node pooling ratio  $\eta_v$  and maximum of cluster sizes  $\tau_c$ .

---

**Algorithm 1** Get Cluster Index And Cluster Size of a Node (Using disjoint-set data structure)

---

```

function InitializeDisjointSet(graph  $\mathcal{G}(\mathcal{V}, \mathcal{E})$ )
  for  $v \in \mathcal{V}$  do
     $index[v] = v$  {the identifier of the cluster the node  $v$  belongs to}
  end for
end function
function FindIndex(node  $v$ )
  if  $index[v] = v$  then
    return  $v$ 
  else
     $index[v] \leftarrow \text{FindIndex}(index[v])$ 
    return  $index[v]$ 
  end if
end function
function FindIndexAndSize(node  $v$ )
   $i \leftarrow \text{FindIndex}(v)$ 
   $s \leftarrow size[i]$ 
  return  $i, s$ 
end function
function MERGE(cluster index  $x$ , cluster index  $y$ )
   $size[y] \leftarrow size[x] + size[y]$ 
   $index[x] \leftarrow index[y]$ 
end function

```

---

### 668 C.3 GFuN

669 We first realize the  $\phi_e, \phi_v, \phi_u$  functions in the full GN block (Sec 2.1 and [6]) as neural networks:

$$\mathbf{E}'_k = \text{NN}_e(\mathbf{E}_k, \mathbf{V}_{s_k}, \mathbf{V}_{t_k}, \mathbf{u}), \quad (2)$$

$$\mathbf{V}'_i = \text{NN}_v(\bar{\mathbf{E}}'_i, \mathbf{V}_i, \mathbf{u}), \quad (3)$$

$$\mathbf{u}' = \text{NN}_u(\bar{\mathbf{E}}', \bar{\mathbf{V}}', \mathbf{u}), \quad (4)$$

670 respectively, where

$$\bar{\mathbf{E}}'_i = \rho^{e \rightarrow v}(\{\mathbf{E}'_k\}_{k \in [1 \dots N^e], t_k = i}), \quad (5)$$

$$\bar{\mathbf{E}}' = \rho^{e \rightarrow u}(\mathbf{E}'), \quad (6)$$

$$\bar{\mathbf{V}}' = \rho^{v \rightarrow u}(\mathbf{V}'). \quad (7)$$

671 We further decompose the neural networks according to the features in the function:

$$\text{NN}_e(\mathbf{E}_k, \mathbf{V}_{s_k}, \mathbf{V}_{t_k}, \mathbf{u}) = \text{NN}_{e \leftarrow e}(\mathbf{E}_k) + \text{NN}_{e \leftarrow v_s}(\mathbf{V}_{s_k}) + \text{NN}_{e \leftarrow v_t}(\mathbf{V}_{t_k}) + \text{NN}_{e \leftarrow u}(\mathbf{u}), \quad (8)$$

$$\text{NN}_v(\bar{\mathbf{E}}'_i, \mathbf{V}_i, \mathbf{u}) = \text{NN}_{v \leftarrow e}(\bar{\mathbf{E}}'_i) + \text{NN}_{v \leftarrow v}(\mathbf{V}_i) + \text{NN}_{v \leftarrow u}(\mathbf{u}), \quad (9)$$

$$\text{NN}_u(\bar{\mathbf{E}}', \bar{\mathbf{V}}', \mathbf{u}) = \text{NN}_{u \leftarrow e}(\bar{\mathbf{E}}') + \text{NN}_{u \leftarrow v}(\bar{\mathbf{V}}') + \text{NN}_{u \leftarrow u}(\mathbf{u}) \quad (10)$$

---

**Algorithm 2** Strided EdgePool

---

**input** graph  $\mathcal{G} = (\mathcal{V}, \mathcal{E})$ , edge scores  $\mathbf{w}$ , node pooling ratio  $\eta_v$ , maximum cluster sizes  $\tau_c$ .

**output** pooled graph  $\tilde{\mathcal{G}} = (\tilde{\mathcal{V}}, \tilde{\mathcal{E}})$  and inter graph  $\hat{\mathcal{G}} = (\hat{\mathcal{V}}, \hat{\mathcal{E}})$

InitializeDisjointSet( $\mathcal{G}$ )

$remains \leftarrow N^v$  { $N^v$  is the number of nodes in graph  $\mathcal{G}$ }

$\tilde{\mathcal{E}} \leftarrow$  Sort the edges  $\mathcal{E}$  according to the edge scores  $\mathbf{w}$  decreasingly.

**for**  $e \in \tilde{\mathcal{E}}$  **do**

$x, y \leftarrow$  the two endpoints of the edge  $e$

$rx, sx \leftarrow \text{FindIndexAndSize}(x)$

$ry, sy \leftarrow \text{FindIndexAndSize}(y)$

**if**  $rx \neq ry$  and  $(sx + sy \leq \tau_c)$  **then**

        Merge( $x, y$ )

$remains \leftarrow remains - 1$

**if**  $remains \leq N^v * \eta_v$  **then**

**break**

**end if**

**end if**

**end for**

$\tilde{\mathcal{V}}, \tilde{\mathcal{E}}, \hat{\mathcal{V}}, \hat{\mathcal{E}} \leftarrow \{\}, \{\}, \{\}, \{\}$

create empty mapping  $c2n$  from cluster index to nodes

**for**  $v \in \mathcal{V}$  **do**

**if** FindIndex( $v$ ) =  $v$  **then**

        create new node  $\tilde{v}$

$c2n[v] = \tilde{v}$

$\tilde{\mathcal{V}} \leftarrow \tilde{\mathcal{V}} \cup \{\tilde{v}\}$

**end if**

**end for**

**for**  $e \in \tilde{\mathcal{E}}$  **do**

$x, y \leftarrow$  the two endpoints of the edge  $e$

$\tilde{x} \leftarrow c2n[\text{FindIndex}(x)]$

$\tilde{y} \leftarrow c2n[\text{FindIndex}(y)]$

$\hat{\mathcal{E}} \leftarrow \hat{\mathcal{E}} \cup \{(\tilde{x}, \tilde{y})\}$

**end for**

**for**  $v \in \mathcal{V}$  **do**

$\tilde{v} \leftarrow c2n[\text{FindIndex}(v)]$

$\hat{\mathcal{E}} \leftarrow \hat{\mathcal{E}} \cup \{(v, \tilde{v})\}$

**end for**

$\hat{\mathcal{V}} \leftarrow \mathcal{V} \cup \tilde{\mathcal{V}}$

---

672 However, such GN block uses 10 times the number of parameters as the standard GCN [31] layer  
673 when the node, edge and global embedding dimensions are all equivalent. In practice, we disable all  
674 computations related to global features  $\mathbf{u}$ , as well as the neural networks  $\text{NN}_{e \leftarrow e}$  and  $\text{NN}_{e \leftarrow v_t}$ . We  
675 also set  $\text{NN}_{v \leftarrow e}$  to be Identity.

676 In practice, we use the summation function as the aggregator function  $\rho^{e \rightarrow v}$  by default. But other  
677 choices like MEAN, MAX, gated summation, attention or their combinations can also be used.

678 Overall, we call such GN block as graph full network (GFuN).

#### 679 C.4 Encoder and Decoder

680 **Encoder.** For input embedding, we use the Linear layer or Embedding layer to embed input features.  
681 For example, we follow [13] and use the Linear layer on MNIST and CIFAR10 datasets, and use  
682 the Embedding layer on ZINC and AQSOL datasets. For the molecular graph in OGB, we use the  
683 same embedding method as in the original work [26]. Besides, we can adopt positional encoding  
684 methods like Laplacian [13] and Random Walk [14] to further embed global and local graph structure  
685 information. The embedding of positional encoding can be combined into (like concatenation,  
686 addition, etc.) input features and form new embeddings.

687 **Decoder.** We can freely choose from the multi-scale features computed during the *process* stage as  
 688 inputs to the decoder module. Empirically, we use the features on the original graph for prediction in  
 689 all experiments. For node-level tasks, we apply a last GNN layer on the original graph to get logits  
 690 for every node. For graph-level tasks, we first use global pooling functions to aggregate features. We  
 691 can use common global pooling methods like SUM, MEAN, MAX, or their combination. After the  
 692 global pool, we use MLP layer(s) to generate the prediction.

## 693 C.5 Architecture Variants

694 We can replace some GN blocks within Mee layers as an Identity block to reduce the time complexity.  
 695 We call the height  $j$  is reserved if the intra GN block of height  $j$  is not replaced by an Identity block.  
 696 We prefer to reserve an interval of consecutive heights for the Mee layers. (The inter GN blocks  
 697 between these heights remain unchanged while others are replaced as identities) By varying the  
 698 heights reserved in each Mee layers, we can create a large number of variants of MeGraph model  
 699 including U-Shaped, Bridge-Shaped and Staircase-Shaped.

700 **U-Shaped.** This variant is similar to Graph U-Net [20]. In this U-Shaped variant, the relationship  
 701 between the number of layers  $n$  and height  $h$  is  $n = 2h + 1$ , and there is only one GN block in each  
 702 layer. We keep the GN block at height  $j = i$  for each layer  $i$  at the first half layers and keep the GN  
 703 block at height  $j = n - i + 1$  for each layer  $i$  at the later half layers. In the middle layer, only the last  
 704 height  $j = h = (n - 1)/2$  has a GN block.

705 **Bridge-Shaped.** In this variant, all GN blocks are combined like an arch bridge. Describe in detail,  
 706 in the first and last layers, there are GN blocks in each height. In other layers, there are GN blocks at  
 707 a height of 1 to  $j$  (where  $1 < j < h$ ).

708 **Staircase-Shaped.** There are four forms in this variant, and the number of layers  $n$  is equal to the  
 709 height  $h$  in all forms. The first form is like the ‘downward’ staircase. In each layer  $i$  of this form,  
 710 there are GN blocks at the height of  $j$  to  $h$  (where  $j = i$ ). The second form is the inverted first form.  
 711 In each layer  $i$  of this second form, there are GN blocks at height of 1 to  $h - i + 1$  (where  $j = i$ ).  
 712 The last two forms are the mirror of the first and second forms.

## 713 D Theoretical Discussions

### 714 D.1 Smaller Number of Aggregation Steps for Capturing Long-Range Interactions

715 We rephrase the analysis provided in [43] as following:

716 We analyze the number of aggregation steps required to capture long-range interactions between  
 717 nodes in the original graph while assuming the node representation capacity is large enough.

718 Standard message-passing GNNs require  $n$  aggregation steps to capture long-range interactions of  $n$   
 719 hops away, therefore requiring a stack of  $n$  layers, which could be expensive when  $n$  is large.

720 We also assume the height  $h$  of the hierarchy is large enough so that all nodes of the original graph  
 721 are pooled into a single node. In that case, the information aggregation along the hierarchy captures  
 722 all pairs of LRIs into the embedding of the single node. Which means the number of aggregation  
 723 steps of MeGraph is  $h$ . When we adopt a pooling method that coarsens the graph at least half,  $h$  is  
 724 at most  $O(\log(|V|))$  where  $|V|$  is the number of nodes of the input graph. Therefore, the height  $h$  is  
 725 significantly smaller than the diameter of the graph (which could be  $O(|V|)$ ) in most cases.

### 726 D.2 MeGraph can degenerate to standard GNNs

727 MeGraph can learn a gating function (within the X-UPD function) that only reserves the features of  
 728 the same scale while performing cross-scale information exchanging. In that case, there will be no  
 729 information exchange across multi-scale graphs, and features other than those in the original scale  
 730 will not be aggregated. We provide a proof sketch below.

731 **Proof:** The cross update function is  $(X'_j, \hat{X}'_j, X'_{j+1}) = \text{X-UPD}(j, X_j, \hat{X}_j, X_{j+1})$ . There is a residual  
 732 function applied here, and we assume it is implemented as a gated residual:  $X''_j = \sigma(\alpha)X_j + \sigma(\beta)X'_j$ ,  
 733 where  $\sigma$  is the sigmoid function and  $\alpha, \beta$  are learnable parameters. Theoretically, it is possible that  
 734  $\sigma(\alpha) = 1$  and  $\sigma(\beta) = 0$  after training. In that case,  $X''_j = X_j$ , which means  $X_j$  is not changed over

Table 6: Running time (s) for one epoch on the GNN benchmark. See Sec. E for more implementation details.

|                     | ZINC  | AQSOL | CIFAR10 | MNIST  | PATTERN | CLUSTER |
|---------------------|-------|-------|---------|--------|---------|---------|
| Megraph ( $h = 5$ ) | 25.69 | 20.22 | 336.63  | 307.23 | 101.52  | 69.65   |
| Megraph ( $h = 1$ ) | 2.41  | 1.67  | 51.74   | 38.60  | 9.21    | 6.52    |

Table 7: Running time (s) for one epoch on the OGBG datasets. See Sec. E for more implementation details.

|                     | molhiv | molbase | molbbbp | molclintox | molsider |
|---------------------|--------|---------|---------|------------|----------|
| Megraph ( $h = 5$ ) | 393.42 | 14.70   | 20.36   | 14.03      | 14.12    |
| Megraph ( $h = 1$ ) | 22.50  | 1.43    | 1.58    | 1.26       | 1.41     |

  

|                     | moltox21 | moltoxcast | molesol | molreesolv | mollipo |
|---------------------|----------|------------|---------|------------|---------|
| Megraph ( $h = 5$ ) | 70.15    | 78.77      | 11.68   | 6.24       | 44.77   |
| Megraph ( $h = 1$ ) | 5.27     | 8.17       | 0.76    | 0.41       | 2.77    |

steps 2 and 3 of the Mee layer. Therefore,  $X_0^i = GN_{intra}^{i,0}(\mathcal{G}, X_0^{i-1})$ , this is equivalent to a simple GNN layer that  $X^i = GNN_i(\mathcal{G}, X^{i-1})$  as  $X_0^i$  is the features of the original graph and  $GN_{intra}$  is a GNN layer. Therefore, MeGraph degenerates to standard message-passing GNNs in this case. ■

## E Implementation and Training Details

We use PyTorch [41] and Deep Graph Library (DGL) [50] to implement our method.

We implement S-EdgePool using DGL, extending from the original implementation of EdgePool in the Pytorch Geometric library (PYG) [17]. We did Constant optimization over the implementation to speed up the training and inference of the pooling. We further use Taichi-Lang [27] to speed up the dynamic node clustering process of S-EdgePool. The practical running time of MeGraph model with height  $h > 1$  after optimization is about  $2h$  times as the  $h = 1$  baseline. This is still slower than the theoretical computational complexity due to the constant in the implementation and the difficulty of paralleling the sequential visitation of edges (according to their scores) in the EdgePool and S-EdgePool. This process could be further sped up by implementing the operations with the CUDA library. We provide the practical running time for  $h > 1$  and  $h = 1$  in GNN benchmark and OGB-G datasets in Tables 6 and 7.

We run all our experiments on V100 GPUs and M40 GPUs. For training the neural networks, we use Adam [30] as the optimizer. We report the hyper-parameters of the MeGraph in Table 8.

For models using GFuN layer as the core GN block, we find it benefits from using layer norms [4]. However, for models using GCN layer as the core GN block, we find it performs best when using batch norms [28].

The code along with the configuration of hyper-parameters to reproduce our experiments is provided in the Supplementary Material and will be made public.

## F Additional Experiment Results

### F.1 Experimental Protocol

We evaluate MeGraph on public real-world graph benchmarks. To fairly compare MeGraph with the baselines, we use the following experimental protocols. We first report the public baseline results and our reproduced standard GCN’s results. We then replace GCN layers with GFuN layers (which is equivalent to MeGraph ( $h = 1$ )) to serve as another baseline. We tune the hyper-parameters (such as learning rate, dropout rate and the readout global pooling method, etc.) of MeGraph ( $h = 1$ ) and choose the best configurations. We then run other diversely configured MeGraph candidates by tuning



Table 8: Hyper-parameters of the standard version of MeGraph for each dataset. It is worth noting that the total number of GNN layers is equals to one plus the number of Mee layers as  $n + 1$ .

| Hyper-parameters               | Synthetic Datasets           | Graph Theory Benchmark   | LRGB Benchmark     | GNN Benchmark                   | OGB Benchmark  | TU Datasets              |
|--------------------------------|------------------------------|--------------------------|--------------------|---------------------------------|----------------|--------------------------|
| Repeated Runs                  | 10                           | 5                        | 4                  | 4                               | 5              | 1 for each fold          |
| Epochs per run                 | 200 for BA*<br>500 for Tree* | 300<br>(200 for MCC)     | 200                | 200<br>(100 for MNIST, CIFRA10) | 100            | 100<br>(200 for ENZYMES) |
| Learning rate                  | 0.002                        | 0.002<br>(0.005 for MCC) | 0.001              | 0.001                           | 0.001          | 0.002                    |
| Weight decay                   | 0.0005                       | 0.0005                   | 0                  | 0                               | 0.0005         | 0.0005                   |
| Node hidden dim                | 64                           | 128                      | 160                | 144                             | 300            | 128                      |
| Edge hidden dim (for GFuN)     | 64                           | 128                      | 160                | 144                             | 300            | 128                      |
| Num Mee layers $n$             | -                            | -                        | 4                  | 3                               | 4              | 2                        |
| Height $h$                     | -                            | -                        | 9                  | 5                               | 5              | 3 or 5                   |
| Batch size                     | 32                           | 32                       | 128                | 128                             | 32             | 128                      |
| Input embedding                | False                        | True                     | True               | True                            | True           | True                     |
| Global pooling                 | Mean                         | Mean<br>Max              | Mean<br>Max<br>Sum | Mean                            | Mean           | Mean<br>Max<br>Sum       |
| Dataset split (train:val:test) | 8:1:1                        | 8:1:1                    | Original split     | Original split                  | Original split | 10-fold cross validation |

other hyper-parameters that only matters for  $h > 1$ , and these hyper-parameters are referred to as the MeGraph hyper-parameters. Detailed configurations are put in Table 8 in App. E.

## F.2 Other Real-World Datasets

**TU dataset** consists of over 120 datasets of varying sizes from a wide range of applications. We choose 10 datasets, 5 of which are molecule datasets (MUTAG, NCI1, PROTEINS, D&D and ENZYMES) and the other 5 are social networks (IMDB-B, IMDB-M, REDDIT-BINARY, REDDIT-MULTI-5K and REDDIT-MULTI-12K). They are all graph classification tasks. For more details of each dataset, please refer to the original work [39].

Our MeGraph uses the same network structure and hyper-parameters for the same type of dataset. As shown in Table 9, our MeGraph achieves about 1% absolute gain than the  $h = 1$  Baselines.

## F.3 GFuN

We show our GFuN results on real-world datasets compared to our reproduced GCN in Table 10, 11 and 12. Both GCN and GFuN have the same hyper-parameters except the batch norm for GCN and layer norm for GFuN as stated in Appendix E.

## F.4 Synthetic Datasets

Figure 5 shows the influence of the height  $h$  and the number of Mee layers  $n$  for MeGraph model on the BASHape and BACommunity datasets. The trend on these easier datasets is similar to that on TreeCycle and TreeGrid but less significant.

Table 9: Results on Tu Dataset. † means the results taken from [9] (\*: The result of GCN on ENZYMES is 100 epoch).

| Model                   | MUTAG ↑     | NCI1 ↑      | PROTEINS ↑  | D&D ↑       | ENZYMES ↑    | Average |
|-------------------------|-------------|-------------|-------------|-------------|--------------|---------|
| GCN†                    | 87.20 ±5.11 | 83.65 ±1.69 | 75.65 ±3.24 | 79.12 ±3.07 | 66.50 ±6.91* | 78.42   |
| GIN†                    | 89.40 ±5.60 | 82.70 ±1.70 | 76.20 ±2.80 | -           | -            | -       |
| GCN                     | 92.46 ±6.55 | 82.55 ±0.99 | 77.82 ±4.52 | 80.56 ±2.40 | 74.17 ±5.59  | 81.51   |
| MeGraph ( $h=1$ )       | 93.01 ±6.83 | 82.53 ±1.89 | 81.32 ±4.08 | 81.32 ±3.17 | 74.83 ±3.20  | 82.60   |
| MeGraph                 | 93.07 ±6.71 | 83.99 ±0.98 | 81.41 ±3.10 | 81.24 ±2.39 | 75.17 ±4.86  | 82.98   |
| MeGraph <sub>best</sub> | 94.12 ±5.02 | 84.40 ±1.11 | 81.68 ±3.40 | 82.00 ±2.86 | 75.17 ±4.86  | 83.47   |

  

| Model                   | IMDB-B ↑    | IMDB-M ↑    | RE-B ↑      | RE-M5K ↑    | RE-M12K ↑   | Average |
|-------------------------|-------------|-------------|-------------|-------------|-------------|---------|
| GCN                     | 76.00 ±3.44 | 50.33 ±1.89 | 91.15 ±1.63 | 56.47 ±1.54 | 48.71 ±0.88 | 64.53   |
| MeGraph ( $h=1$ )       | 68.60 ±3.53 | 51.33 ±2.23 | 93.10 ±1.16 | 57.47 ±2.31 | 51.56 ±1.06 | 64.41   |
| MeGraph                 | 72.40 ±2.80 | 51.27 ±2.71 | 93.75 ±1.25 | 57.69 ±2.22 | 52.03 ±0.86 | 65.43   |
| MeGraph <sub>best</sub> | 74.30 ±2.97 | 52.00 ±2.49 | 93.75 ±1.25 | 58.45 ±2.22 | 52.13 ±1.01 | 66.13   |

Table 10: Comparison between GCN and GFuN on GNN benchmark.

| Model   | ZINC ↓       | AQSOL ↓      | MNIST ↑       | CIFAR10 ↑     | PATTERN ↑     | CLUSTER ↑     |
|---------|--------------|--------------|---------------|---------------|---------------|---------------|
| GCN     | 0.426 ±0.015 | 1.397 ±0.029 | 90.140 ±0.140 | 51.050 ±0.390 | 84.672 ±0.054 | 47.541 ±0.940 |
| GFuN    | 0.364 ±0.003 | 1.386 ±0.024 | 95.560 ±0.190 | 61.060 ±0.500 | 84.845 ±0.021 | 58.178 ±0.079 |
| MeGraph | 0.260 ±0.005 | 1.002 ±0.021 | 97.860 ±0.098 | 69.925 ±0.631 | 86.507 ±0.067 | 68.603 ±0.101 |

## 783 F.5 Varying GN block

784 We vary the aggregation function of the GN block as attention (w/ ATT) and gated function (w/  
785 GATE). We observe similar results as in Sec. 4.2 and 4.3, verifying the robustness of MeGraph over  
786 different GN blocks. Results are shown in Tables 15, 16 and 17.

## 787 F.6 Graph Theory Dataset

788 We provide a list of tables (from Table 18 to 28) showing the individual results of Table 1 for each  
789 possible graph generation method. Each table contains a list of variants of models and 5 tasks. Some  
790 graph generation methods and task combinations are trivial so we filter them out.

Table 11: Comparison between GCN and GFuN on OGB-G.

| Model   | molhiv ↑    | molbace ↑   | molbbbp ↑   | molclintox ↑ | molsider ↑  |
|---------|-------------|-------------|-------------|--------------|-------------|
| GCN     | 75.40 ±1.29 | 76.01 ±3.31 | 67.35 ±0.96 | 89.62 ±2.27  | 58.08 ±0.78 |
| GFuN    | 78.54 ±1.14 | 71.77 ±2.15 | 67.56 ±1.11 | 89.77 ±3.48  | 58.28 ±0.51 |
| MeGraph | 77.20 ±0.88 | 78.52 ±2.51 | 69.57 ±2.33 | 92.04 ±2.19  | 59.01 ±1.45 |

  

| Model   | moltox21 ↑  | moltoxcast ↑ | molesol ↓   | molreesolv ↓ | mollipo ↓   |
|---------|-------------|--------------|-------------|--------------|-------------|
| GCN     | 75.11 ±0.41 | 64.13 ±0.52  | 1.141 ±0.02 | 2.407 ±0.15  | 0.788 ±0.01 |
| GFuN    | 75.89 ±0.45 | 64.49 ±0.46  | 1.079 ±0.02 | 2.017 ±0.08  | 0.768 ±0.00 |
| MeGraph | 78.11 ±0.47 | 67.67 ±0.53  | 0.886 ±0.02 | 1.876 ±0.05  | 0.726 ±0.00 |

Table 12: Comparison between GCN and GFuN on Tu Dataset.

| Model | MUTAG $\uparrow$ | NCI1 $\uparrow$  | PROTEINS $\uparrow$ | D&D $\uparrow$   | ENZYMES $\uparrow$ | Average |
|-------|------------------|------------------|---------------------|------------------|--------------------|---------|
| GCN   | 92.46 $\pm$ 6.55 | 82.55 $\pm$ 0.99 | 77.82 $\pm$ 4.52    | 80.56 $\pm$ 2.40 | 74.17 $\pm$ 5.59   | 81.51   |
| GFuN  | 93.01 $\pm$ 7.96 | 82.80 $\pm$ 1.30 | 80.60 $\pm$ 3.83    | 82.43 $\pm$ 2.60 | 73.00 $\pm$ 5.31   | 82.37   |

---

| Model | IMDB-B $\uparrow$ | IMDB-M $\uparrow$ | RE-B $\uparrow$  | RE-M5K $\uparrow$ | RE-M12K $\uparrow$ | Average |
|-------|-------------------|-------------------|------------------|-------------------|--------------------|---------|
| GCN   | 76.00 $\pm$ 3.44  | 50.33 $\pm$ 1.89  | 91.15 $\pm$ 1.63 | 56.47 $\pm$ 1.54  | 48.71 $\pm$ 0.88   | 64.53   |
| GFuN  | 68.90 $\pm$ 3.42  | 51.27 $\pm$ 3.22  | 92.25 $\pm$ 1.12 | 57.53 $\pm$ 1.31  | 51.54 $\pm$ 1.19   | 64.30   |

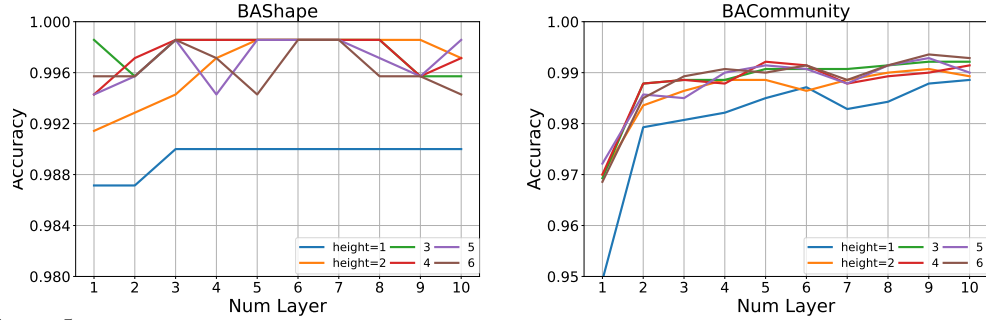Figure 5: Node Classification accuracy for MeGraph model on BASHape (left) and BACommunity (right) datasets, varying the height  $h$  and the number of Mee layers  $n$ . A clear gap can be observed between heights 1 and  $\geq 2$ . The concrete number of accuracy can be found in Table 14.

Table 13: Node Classification accuracy for MeGraph model on TreeCycle (above) and TreeGrid (below).

| height \ layer | 1                | 2                | 3                | 4                | 5                | 6                |
|----------------|------------------|------------------|------------------|------------------|------------------|------------------|
| 1              | 61.48 $\pm$ 6.04 | 76.59 $\pm$ 4.41 | 91.48 $\pm$ 2.70 | 98.52 $\pm$ 1.69 | 97.95 $\pm$ 2.32 | 98.52 $\pm$ 1.35 |
| 2              | 67.27 $\pm$ 6.91 | 81.59 $\pm$ 4.03 | 97.39 $\pm$ 1.25 | 98.98 $\pm$ 0.94 | 98.75 $\pm$ 1.29 | 98.86 $\pm$ 1.14 |
| 3              | 74.43 $\pm$ 3.60 | 90.80 $\pm$ 2.61 | 98.64 $\pm$ 1.11 | 99.09 $\pm$ 1.11 | 98.75 $\pm$ 1.56 | 99.09 $\pm$ 0.85 |
| 4              | 79.55 $\pm$ 4.34 | 93.41 $\pm$ 2.82 | 99.20 $\pm$ 0.73 | 99.20 $\pm$ 0.89 | 99.66 $\pm$ 0.73 | 99.20 $\pm$ 1.69 |
| 5              | 82.73 $\pm$ 4.06 | 93.41 $\pm$ 1.89 | 99.43 $\pm$ 1.05 | 99.20 $\pm$ 1.35 | 99.32 $\pm$ 1.16 | 99.32 $\pm$ 0.56 |
| 6              | 83.18 $\pm$ 3.51 | 94.09 $\pm$ 2.02 | 99.43 $\pm$ 0.76 | 99.09 $\pm$ 0.85 | 99.20 $\pm$ 1.69 | 99.20 $\pm$ 0.89 |
| 7              | 84.43 $\pm$ 3.74 | 94.43 $\pm$ 2.24 | 99.89 $\pm$ 0.34 | 99.20 $\pm$ 1.02 | 99.20 $\pm$ 0.89 | 99.66 $\pm$ 0.73 |
| 8              | 84.20 $\pm$ 3.82 | 94.20 $\pm$ 2.00 | 98.98 $\pm$ 1.19 | 99.32 $\pm$ 0.75 | 99.66 $\pm$ 0.52 | 99.20 $\pm$ 0.73 |
| 9              | 84.43 $\pm$ 3.87 | 94.20 $\pm$ 2.06 | 99.77 $\pm$ 0.45 | 99.20 $\pm$ 1.02 | 98.98 $\pm$ 1.07 | 99.32 $\pm$ 0.75 |
| 10             | 84.77 $\pm$ 3.98 | 94.43 $\pm$ 2.18 | 99.32 $\pm$ 0.75 | 98.86 $\pm$ 1.14 | 99.09 $\pm$ 1.67 | 99.66 $\pm$ 0.52 |

---

| height \ layer | 1                | 2                | 3                | 4                | 5                | 6                |
|----------------|------------------|------------------|------------------|------------------|------------------|------------------|
| 1              | 79.11 $\pm$ 3.07 | 91.13 $\pm$ 2.01 | 96.85 $\pm$ 1.11 | 97.18 $\pm$ 1.31 | 97.10 $\pm$ 1.45 | 97.42 $\pm$ 1.34 |
| 2              | 89.68 $\pm$ 1.76 | 93.55 $\pm$ 1.53 | 98.31 $\pm$ 0.76 | 97.82 $\pm$ 1.14 | 97.42 $\pm$ 1.24 | 97.98 $\pm$ 0.74 |
| 3              | 90.81 $\pm$ 1.36 | 96.13 $\pm$ 1.48 | 97.66 $\pm$ 1.22 | 98.23 $\pm$ 0.94 | 98.87 $\pm$ 0.82 | 98.39 $\pm$ 0.62 |
| 4              | 91.53 $\pm$ 1.04 | 96.69 $\pm$ 1.05 | 98.06 $\pm$ 1.03 | 98.55 $\pm$ 1.01 | 98.63 $\pm$ 1.08 | 97.98 $\pm$ 1.15 |
| 5              | 93.95 $\pm$ 1.58 | 96.13 $\pm$ 1.76 | 98.47 $\pm$ 1.17 | 98.47 $\pm$ 0.92 | 98.31 $\pm$ 0.84 | 97.90 $\pm$ 0.65 |
| 6              | 94.35 $\pm$ 1.25 | 96.69 $\pm$ 1.46 | 98.06 $\pm$ 1.03 | 98.31 $\pm$ 1.05 | 98.15 $\pm$ 1.20 | 98.39 $\pm$ 1.20 |
| 7              | 94.76 $\pm$ 1.10 | 97.02 $\pm$ 1.44 | 98.47 $\pm$ 0.84 | 98.47 $\pm$ 1.05 | 98.71 $\pm$ 0.74 | 98.87 $\pm$ 0.90 |
| 8              | 95.08 $\pm$ 0.76 | 97.02 $\pm$ 1.20 | 98.55 $\pm$ 1.24 | 98.87 $\pm$ 0.82 | 98.47 $\pm$ 0.92 | 98.71 $\pm$ 1.15 |
| 9              | 94.68 $\pm$ 1.09 | 96.94 $\pm$ 1.19 | 98.47 $\pm$ 0.43 | 98.15 $\pm$ 1.20 | 98.15 $\pm$ 0.89 | 98.39 $\pm$ 1.08 |
| 10             | 94.84 $\pm$ 1.21 | 96.77 $\pm$ 1.20 | 98.47 $\pm$ 0.92 | 97.98 $\pm$ 1.50 | 98.15 $\pm$ 1.02 | 98.23 $\pm$ 1.19 |

Table 14: Node Classification accuracy for MeGraph model on BAShape (above) and BACommunity (below).

| height<br>layer | 1                | 2                | 3                | 4                | 5                | 6                |
|-----------------|------------------|------------------|------------------|------------------|------------------|------------------|
| 1               | 98.71 $\pm$ 1.00 | 99.14 $\pm$ 1.14 | 99.86 $\pm$ 0.43 | 99.43 $\pm$ 0.70 | 99.43 $\pm$ 0.95 | 99.57 $\pm$ 0.91 |
| 2               | 98.71 $\pm$ 1.00 | 99.29 $\pm$ 0.96 | 99.57 $\pm$ 0.91 | 99.71 $\pm$ 0.57 | 99.57 $\pm$ 0.91 | 99.57 $\pm$ 0.91 |
| 3               | 99.00 $\pm$ 0.91 | 99.43 $\pm$ 0.95 | 99.86 $\pm$ 0.43 | 99.86 $\pm$ 0.43 | 99.86 $\pm$ 0.43 | 99.86 $\pm$ 0.43 |
| 4               | 99.00 $\pm$ 0.91 | 99.71 $\pm$ 0.57 | 99.86 $\pm$ 0.43 | 99.86 $\pm$ 0.43 | 99.43 $\pm$ 0.95 | 99.71 $\pm$ 0.57 |
| 5               | 99.00 $\pm$ 0.91 | 99.86 $\pm$ 0.43 | 99.86 $\pm$ 0.43 | 99.86 $\pm$ 0.43 | 99.86 $\pm$ 0.43 | 99.43 $\pm$ 0.95 |
| 6               | 99.00 $\pm$ 0.91 | 99.86 $\pm$ 0.43 |
| 7               | 99.00 $\pm$ 0.91 | 99.86 $\pm$ 0.43 |
| 8               | 99.00 $\pm$ 0.91 | 99.86 $\pm$ 0.43 | 99.86 $\pm$ 0.43 | 99.86 $\pm$ 0.43 | 99.71 $\pm$ 0.57 | 99.57 $\pm$ 0.65 |
| 9               | 99.00 $\pm$ 0.91 | 99.86 $\pm$ 0.43 | 99.57 $\pm$ 0.91 | 99.57 $\pm$ 0.91 | 99.57 $\pm$ 0.91 | 99.57 $\pm$ 0.91 |
| 10              | 99.00 $\pm$ 0.91 | 99.71 $\pm$ 0.57 | 99.57 $\pm$ 0.91 | 99.71 $\pm$ 0.57 | 99.86 $\pm$ 0.43 | 99.43 $\pm$ 0.95 |

  

| height<br>layer | 1                | 2                | 3                | 4                | 5                | 6                |
|-----------------|------------------|------------------|------------------|------------------|------------------|------------------|
| 1               | 94.93 $\pm$ 1.30 | 97.00 $\pm$ 1.80 | 96.93 $\pm$ 1.60 | 97.00 $\pm$ 1.88 | 97.21 $\pm$ 1.70 | 96.86 $\pm$ 1.67 |
| 2               | 97.93 $\pm$ 0.87 | 98.36 $\pm$ 0.72 | 98.79 $\pm$ 0.46 | 98.79 $\pm$ 0.46 | 98.57 $\pm$ 0.55 | 98.50 $\pm$ 1.03 |
| 3               | 98.07 $\pm$ 0.91 | 98.64 $\pm$ 0.87 | 98.86 $\pm$ 0.91 | 98.86 $\pm$ 0.80 | 98.50 $\pm$ 0.98 | 98.93 $\pm$ 0.80 |
| 4               | 98.21 $\pm$ 0.97 | 98.86 $\pm$ 0.65 | 98.86 $\pm$ 0.80 | 98.79 $\pm$ 0.64 | 99.00 $\pm$ 0.73 | 99.07 $\pm$ 0.64 |
| 5               | 98.50 $\pm$ 0.87 | 98.86 $\pm$ 0.91 | 99.07 $\pm$ 0.64 | 99.21 $\pm$ 0.67 | 99.14 $\pm$ 0.70 | 99.00 $\pm$ 0.73 |
| 6               | 98.71 $\pm$ 0.83 | 98.64 $\pm$ 0.87 | 99.07 $\pm$ 0.64 | 99.14 $\pm$ 0.70 | 99.07 $\pm$ 0.85 | 99.14 $\pm$ 0.70 |
| 7               | 98.29 $\pm$ 0.91 | 98.86 $\pm$ 0.65 | 99.07 $\pm$ 0.56 | 98.79 $\pm$ 0.56 | 98.79 $\pm$ 0.72 | 98.86 $\pm$ 0.57 |
| 8               | 98.43 $\pm$ 0.77 | 99.00 $\pm$ 0.47 | 99.14 $\pm$ 0.53 | 98.93 $\pm$ 0.58 | 99.14 $\pm$ 0.29 | 99.14 $\pm$ 0.43 |
| 9               | 98.79 $\pm$ 0.79 | 99.07 $\pm$ 0.56 | 99.21 $\pm$ 0.50 | 99.00 $\pm$ 0.73 | 99.29 $\pm$ 0.45 | 99.36 $\pm$ 0.50 |
| 10              | 98.86 $\pm$ 0.73 | 98.93 $\pm$ 0.80 | 99.21 $\pm$ 0.87 | 99.14 $\pm$ 0.70 | 99.00 $\pm$ 0.73 | 99.29 $\pm$ 0.64 |

Table 15: Comparison results of MeGraph with ATT and GATE on Graph Theory Benchmark.

| Category        | Model                             | SP <sub>sssd</sub> | MCC               | Diameter          | SP <sub>ss</sub>  | ECC               |
|-----------------|-----------------------------------|--------------------|-------------------|-------------------|-------------------|-------------------|
| MeGraph w. ATT  | $h = 1$                           | 2.990 $\pm$ 3.411  | 3.346 $\pm$ 3.228 | 44.41 $\pm$ 36.33 | 16.39 $\pm$ 13.57 | 29.04 $\pm$ 27.59 |
|                 | $h = 5$                           | 0.594 $\pm$ 0.903  | 1.706 $\pm$ 1.409 | 3.256 $\pm$ 2.956 | 1.018 $\pm$ 1.071 | 14.80 $\pm$ 17.09 |
|                 | $h = 5, \eta_v = 0.3, \tau_c = 4$ | 0.749 $\pm$ 1.131  | 1.128 $\pm$ 0.794 | 4.430 $\pm$ 4.329 | 0.640 $\pm$ 0.833 | 5.649 $\pm$ 4.496 |
| MeGraph w. GATE | $h = 1$                           | 4.144 $\pm$ 4.181  | 0.908 $\pm$ 0.934 | 6.343 $\pm$ 7.152 | 13.94 $\pm$ 12.78 | 19.73 $\pm$ 19.47 |
|                 | $h = 5$                           | 0.809 $\pm$ 0.993  | 0.660 $\pm$ 0.601 | 2.506 $\pm$ 2.639 | 0.669 $\pm$ 0.546 | 7.508 $\pm$ 7.558 |
|                 | $h = 5, \eta_v = 0.3, \tau_c = 4$ | 0.602 $\pm$ 0.622  | 0.599 $\pm$ 0.520 | 0.544 $\pm$ 0.490 | 0.342 $\pm$ 0.193 | 0.859 $\pm$ 0.712 |

Table 16: Comparison results of MeGraph with ATT and GATE on GNN Benchmark.

|                             | ZINC                | AQSOL               | CIFAR10            | MNIST              | PATTERN            | CLUSTER            |
|-----------------------------|---------------------|---------------------|--------------------|--------------------|--------------------|--------------------|
| MeGraph w. ATT ( $h = 1$ )  | 0.4258 $\pm$ 0.0054 | 1.1421 $\pm$ 0.0270 | 69.890 $\pm$ 0.209 | 97.570 $\pm$ 0.168 | 78.232 $\pm$ 0.827 | 59.497 $\pm$ 0.207 |
| MeGraph w. ATT ( $h = 5$ )  | 0.3637 $\pm$ 0.0116 | 1.0767 $\pm$ 0.0105 | 69.925 $\pm$ 0.631 | 97.860 $\pm$ 0.098 | 83.798 $\pm$ 0.885 | 68.930 $\pm$ 68.76 |
| MeGraph w. GATE ( $h = 1$ ) | 0.3336 $\pm$ 0.0036 | 1.0766 $\pm$ 1.0556 | 64.200 $\pm$ 0.586 | 96.812 $\pm$ 0.205 | 85.391 $\pm$ 0.029 | 59.321 $\pm$ 0.290 |
| MeGraph w. GATE ( $h = 5$ ) | 0.2897 $\pm$ 0.0291 | 1.0240 $\pm$ 0.0098 | 64.935 $\pm$ 0.829 | 97.290 $\pm$ 0.140 | 86.611 $\pm$ 0.041 | 67.122 $\pm$ 3.323 |

Table 17: Comparison results of MeGraph with ATT and GATE on OGB-G.

| Model                       | molhiv $\uparrow$ | molbase $\uparrow$ | molbbbp $\uparrow$ | molclintox $\uparrow$ | molssider $\uparrow$ |
|-----------------------------|-------------------|--------------------|--------------------|-----------------------|----------------------|
| MeGraph w. ATT ( $h = 1$ )  | 77.33 $\pm$ 0.78  | 74.83 $\pm$ 4.87   | 64.74 $\pm$ 1.14   | 86.34 $\pm$ 1.04      | 58.12 $\pm$ 0.53     |
| MeGraph w. ATT ( $h = 5$ )  | 77.15 $\pm$ 1.37  | 76.13 $\pm$ 3.85   | 68.68 $\pm$ 2.07   | 87.17 $\pm$ 0.76      | 58.03 $\pm$ 1.58     |
| MeGraph w. GATE ( $h = 1$ ) | 76.35 $\pm$ 0.70  | 76.36 $\pm$ 1.55   | 65.97 $\pm$ 1.98   | 87.12 $\pm$ 0.74      | 58.11 $\pm$ 1.29     |
| MeGraph w. GATE ( $h = 5$ ) | 78.14 $\pm$ 0.91  | 78.90 $\pm$ 1.29   | 66.53 $\pm$ 0.74   | 89.02 $\pm$ 2.56      | 59.58 $\pm$ 1.88     |

  

| Model                       | moltox21 $\uparrow$ | moltoxcast $\uparrow$ | molesol $\downarrow$ | molffreesolv $\downarrow$ | molliipo $\downarrow$ |
|-----------------------------|---------------------|-----------------------|----------------------|---------------------------|-----------------------|
| MeGraph w. ATT ( $h = 1$ )  | 75.88 $\pm$ 0.64    | 64.65 $\pm$ 0.59      | 1.091 $\pm$ 0.030    | 2.318 $\pm$ 0.089         | 0.790 $\pm$ 0.012     |
| MeGraph w. ATT ( $h = 5$ )  | 76.71 $\pm$ 0.98    | 66.98 $\pm$ 0.70      | 1.007 $\pm$ 0.617    | 2.065 $\pm$ 0.151         | 0.736 $\pm$ 0.023     |
| MeGraph w. GATE ( $h = 1$ ) | 75.30 $\pm$ 0.43    | 64.34 $\pm$ 0.62      | 1.064 $\pm$ 0.015    | 2.191 $\pm$ 0.068         | 0.766 $\pm$ 0.008     |
| MeGraph w. GATE ( $h = 5$ ) | 76.91 $\pm$ 0.25    | 66.78 $\pm$ 0.13      | 1.003 $\pm$ 0.086    | 2.048 $\pm$ 0.199         | 0.700 $\pm$ 0.014     |

Table 18: Graph Theory Benchmark results on Grid graphs, all results are obtained using our codebase.

| Category                                            | Model                            | SP <sub>sssd</sub> | MCC              | Diameter          | SP <sub>ss</sub>  | ECC               |
|-----------------------------------------------------|----------------------------------|--------------------|------------------|-------------------|-------------------|-------------------|
| Baselines<br>( $h=1$ )                              | $n=1$                            | 6.60 $\pm$ 0.541   | 1.50 $\pm$ 0.050 | 22.49 $\pm$ 1.36  | 26.74 $\pm$ 0.347 | 20.99 $\pm$ 0.232 |
|                                                     | $n=5$                            | 4.18 $\pm$ 0.737   | 1.29 $\pm$ 0.124 | 5.04 $\pm$ 1.26   | 15.54 $\pm$ 0.155 | 20.32 $\pm$ 0.326 |
|                                                     | $n=10$                           | 3.70 $\pm$ 0.422   | 1.33 $\pm$ 0.100 | 0.737 $\pm$ 0.116 | 7.24 $\pm$ 0.243  | 20.32 $\pm$ 0.422 |
| MeGraph( $h=5$ )                                    | $n=1$                            | 1.19 $\pm$ 0.486   | 1.24 $\pm$ 0.154 | 6.78 $\pm$ 1.95   | 5.34 $\pm$ 0.265  | 18.00 $\pm$ 0.910 |
| EdgePool( $\tau_c=2$ )                              | $n=5$                            | 0.738 $\pm$ 0.322  | 1.11 $\pm$ 0.043 | 0.616 $\pm$ 0.310 | 0.617 $\pm$ 0.099 | 13.3 $\pm$ 3.31   |
| MeGraph<br>S-EdgePool<br>Variants<br>( $h=5, n=5$ ) | $\tau_c=3$                       | 0.361 $\pm$ 0.182  | 1.24 $\pm$ 0.113 | 0.382 $\pm$ 0.120 | 0.442 $\pm$ 0.130 | 0.918 $\pm$ 0.220 |
|                                                     | $\eta_v=0.3$                     | 4.77 $\pm$ 2.50    | 1.33 $\pm$ 0.161 | 0.349 $\pm$ 0.074 | 5.40 $\pm$ 0.954  | 3.59 $\pm$ 0.354  |
|                                                     | $\eta_v=0.3, \tau_c=4$           | 0.745 $\pm$ 0.316  | 1.35 $\pm$ 0.168 | 0.385 $\pm$ 0.180 | 0.552 $\pm$ 0.113 | 0.622 $\pm$ 0.100 |
|                                                     | $\eta_v=0.5, \tau_c=4$           | 1.61 $\pm$ 0.394   | 1.28 $\pm$ 0.138 | 0.458 $\pm$ 0.220 | 1.71 $\pm$ 0.535  | 1.48 $\pm$ 0.283  |
|                                                     | $\eta_v=0.3, \tau_c=4$ (X-Pool)  | 1.03 $\pm$ 0.365   | 1.50 $\pm$ 0.142 | 0.626 $\pm$ 0.216 | 1.70 $\pm$ 0.185  | 3.44 $\pm$ 0.991  |
|                                                     | $\eta_v=0.3, \tau_c=4$ (w/o pw)  | 0.616 $\pm$ 0.194  | 1.66 $\pm$ 0.083 | 0.361 $\pm$ 0.147 | 0.678 $\pm$ 0.139 | 1.70 $\pm$ 0.485  |
| Graph-UNets                                         | $h=5, n=9, \eta_v=0.3, \tau_c=4$ | 0.969 $\pm$ 0.643  | 2.18 $\pm$ 0.381 | 0.111 $\pm$ 0.091 | 0.773 $\pm$ 0.086 | 0.548 $\pm$ 0.131 |

Table 19: Graph Theory Benchmark results on Tree graphs. All results are obtained using our codebase.

| Category                                            | Model                            | SP <sub>sssd</sub> | MCC               | Diameter          | SP <sub>ss</sub>  | ECC               |
|-----------------------------------------------------|----------------------------------|--------------------|-------------------|-------------------|-------------------|-------------------|
| Baselines<br>( $h=1$ )                              | $n=1$                            | 5.21 $\pm$ 0.209   | 1.28 $\pm$ 0.050  | 3.77 $\pm$ 1.22   | 17.16 $\pm$ 0.168 | 24.63 $\pm$ 0.427 |
|                                                     | $n=5$                            | 3.34 $\pm$ 0.375   | 0.405 $\pm$ 0.089 | 0.504 $\pm$ 0.109 | 7.66 $\pm$ 0.325  | 18.11 $\pm$ 1.85  |
|                                                     | $n=10$                           | 3.16 $\pm$ 0.252   | 0.338 $\pm$ 0.046 | 0.100 $\pm$ 0.059 | 2.28 $\pm$ 0.209  | 14.93 $\pm$ 0.800 |
| MeGraph( $h=5$ )                                    | $n=1$                            | 1.62 $\pm$ 0.314   | 0.846 $\pm$ 0.071 | 0.725 $\pm$ 0.249 | 6.99 $\pm$ 0.610  | 12.27 $\pm$ 0.843 |
| EdgePool( $\tau_c=2$ )                              | $n=5$                            | 0.83 $\pm$ 0.667   | 0.490 $\pm$ 0.118 | 0.084 $\pm$ 0.030 | 1.27 $\pm$ 0.442  | 2.87 $\pm$ 0.420  |
| MeGraph<br>S-EdgePool<br>Variants<br>( $h=5, n=5$ ) | $\tau_c=3$                       | 0.599 $\pm$ 0.200  | 0.483 $\pm$ 0.081 | 0.075 $\pm$ 0.012 | 0.497 $\pm$ 0.121 | 0.429 $\pm$ 0.105 |
|                                                     | $\eta_v=0.3$                     | 0.868 $\pm$ 0.230  | 0.413 $\pm$ 0.054 | 0.142 $\pm$ 0.047 | 0.789 $\pm$ 0.092 | 0.534 $\pm$ 0.074 |
|                                                     | $\eta_v=0.3, \tau_c=4$           | 0.615 $\pm$ 0.209  | 0.418 $\pm$ 0.024 | 0.081 $\pm$ 0.017 | 0.440 $\pm$ 0.106 | 0.436 $\pm$ 0.097 |
|                                                     | $\eta_v=0.5, \tau_c=4$           | 1.06 $\pm$ 0.327   | 0.424 $\pm$ 0.042 | 0.214 $\pm$ 0.018 | 1.20 $\pm$ 0.128  | 2.03 $\pm$ 0.507  |
|                                                     | $\eta_v=0.3, \tau_c=4$ (X-Pool)  | 0.666 $\pm$ 0.118  | 0.596 $\pm$ 0.067 | 0.182 $\pm$ 0.057 | 1.22 $\pm$ 0.281  | 1.11 $\pm$ 0.122  |
|                                                     | $\eta_v=0.3, \tau_c=4$ (w/o pw)  | 0.771 $\pm$ 0.141  | 0.455 $\pm$ 0.056 | 0.124 $\pm$ 0.032 | 0.700 $\pm$ 0.190 | 1.07 $\pm$ 0.260  |
| Graph-UNets                                         | $h=5, n=9, \eta_v=0.3, \tau_c=4$ | 0.873 $\pm$ 0.247  | 0.667 $\pm$ 0.043 | 0.804 $\pm$ 0.284 | 0.606 $\pm$ 0.123 | 1.00 $\pm$ 0.221  |

Table 20: Graph Theory Benchmark results on Ladder graphs, all results are obtained using our codebase.

| Category                                            | Model                            | SP <sub>sssd</sub> | MCC               | Diameter          | SP <sub>ss</sub>  | ECC               |
|-----------------------------------------------------|----------------------------------|--------------------|-------------------|-------------------|-------------------|-------------------|
| Baselines<br>( $h=1$ )                              | $n=1$                            | 5.06 $\pm$ 0.330   | 1.73 $\pm$ 0.249  | 1.17 $\pm$ 0.149  | 13.20 $\pm$ 0.126 | 20.10 $\pm$ 0.583 |
|                                                     | $n=5$                            | 0.692 $\pm$ 0.204  | 0.734 $\pm$ 0.106 | 1.39 $\pm$ 0.078  | 5.02 $\pm$ 0.876  | 19.81 $\pm$ 0.669 |
|                                                     | $n=10$                           | 0.257 $\pm$ 0.078  | 0.691 $\pm$ 0.119 | 1.55 $\pm$ 0.069  | 1.60 $\pm$ 0.194  | 20.40 $\pm$ 0.995 |
| MeGraph( $h=5$ )                                    | $n=1$                            | 0.662 $\pm$ 0.165  | 0.866 $\pm$ 0.071 | 1.57 $\pm$ 0.992  | 2.18 $\pm$ 0.181  | 6.61 $\pm$ 1.32   |
| EdgePool( $\tau_c=2$ )                              | $n=5$                            | 0.251 $\pm$ 0.108  | 0.753 $\pm$ 0.091 | 0.175 $\pm$ 0.169 | 0.321 $\pm$ 0.058 | 1.18 $\pm$ 0.746  |
| MeGraph<br>S-EdgePool<br>Variants<br>( $h=5, n=5$ ) | $\tau_c=3$                       | 0.296 $\pm$ 0.070  | 0.754 $\pm$ 0.086 | 0.226 $\pm$ 0.069 | 0.228 $\pm$ 0.021 | 0.285 $\pm$ 0.069 |
|                                                     | $\eta_v=0.3$                     | 0.507 $\pm$ 0.204  | 0.768 $\pm$ 0.050 | 0.156 $\pm$ 0.053 | 0.969 $\pm$ 0.148 | 0.787 $\pm$ 0.059 |
|                                                     | $\eta_v=0.3, \tau_c=4$           | 0.297 $\pm$ 0.113  | 0.712 $\pm$ 0.059 | 0.095 $\pm$ 0.046 | 0.180 $\pm$ 0.026 | 0.225 $\pm$ 0.043 |
|                                                     | $\eta_v=0.5, \tau_c=4$           | 0.375 $\pm$ 0.196  | 0.656 $\pm$ 0.064 | 0.058 $\pm$ 0.019 | 0.612 $\pm$ 0.191 | 0.464 $\pm$ 0.121 |
|                                                     | $\eta_v=0.3, \tau_c=4$ (X-Pool)  | 0.442 $\pm$ 0.108  | 0.742 $\pm$ 0.047 | 0.158 $\pm$ 0.074 | 0.710 $\pm$ 0.076 | 0.765 $\pm$ 0.089 |
|                                                     | $\eta_v=0.3, \tau_c=4$ (w/o pw)  | 0.245 $\pm$ 0.021  | 0.682 $\pm$ 0.105 | 0.106 $\pm$ 0.052 | 0.271 $\pm$ 0.039 | 0.618 $\pm$ 0.188 |
| Graph-UNets                                         | $h=5, n=9, \eta_v=0.3, \tau_c=4$ | 0.339 $\pm$ 0.11   | 0.797 $\pm$ 0.138 | 0.013 $\pm$ 0.005 | 0.287 $\pm$ 0.023 | 0.230 $\pm$ 0.054 |

Table 21: Graph Theory Benchmark results on Line graphs, all results are obtained using our codebase.

| Category                                            | Model                            | SP <sub>sssd</sub> | MCC               | Diameter          | SP <sub>ss</sub>  | ECC               |
|-----------------------------------------------------|----------------------------------|--------------------|-------------------|-------------------|-------------------|-------------------|
| Baselines<br>( $h=1$ )                              | $n=1$                            | 30.37 $\pm$ 1.41   | 0.458 $\pm$ 0.035 | 21.49 $\pm$ 8.84  | 68.99 $\pm$ 0.247 | 75.46 $\pm$ 1.86  |
|                                                     | $n=5$                            | 10.55 $\pm$ 2.40   | 0.019 $\pm$ 0.004 | 9.97 $\pm$ 10.85  | 46.39 $\pm$ 3.09  | 78.49 $\pm$ 4.38  |
|                                                     | $n=10$                           | 3.29 $\pm$ 0.813   | 0.012 $\pm$ 0.003 | 10.18 $\pm$ 10.59 | 35.07 $\pm$ 2.71  | 77.23 $\pm$ 3.42  |
| MeGraph( $h=5$ )                                    | $n=1$                            | 1.45 $\pm$ 0.598   | 0.056 $\pm$ 0.014 | 7.62 $\pm$ 4.43   | 10.13 $\pm$ 2.33  | 45.19 $\pm$ 8.64  |
| EdgePool( $\tau_c=2$ )                              | $n=5$                            | 0.536 $\pm$ 0.149  | 0.016 $\pm$ 0.007 | 0.611 $\pm$ 0.238 | 1.06 $\pm$ 0.341  | 14.12 $\pm$ 13.82 |
| MeGraph<br>S-EdgePool<br>Variants<br>( $h=5, n=5$ ) | $\tau_c=3$                       | 0.349 $\pm$ 0.206  | 0.013 $\pm$ 0.003 | 0.724 $\pm$ 0.479 | 0.339 $\pm$ 0.102 | 1.15 $\pm$ 0.267  |
|                                                     | $\eta_v=0.3$                     | 3.65 $\pm$ 2.13    | 0.017 $\pm$ 0.005 | 1.75 $\pm$ 1.63   | 13.99 $\pm$ 2.09  | 7.45 $\pm$ 0.989  |
|                                                     | $\eta_v=0.3, \tau_c=4$           | 0.283 $\pm$ 0.072  | 0.019 $\pm$ 0.006 | 0.584 $\pm$ 0.337 | 0.515 $\pm$ 0.044 | 1.27 $\pm$ 1.08   |
|                                                     | $\eta_v=0.5, \tau_c=4$           | 1.81 $\pm$ 0.121   | 0.022 $\pm$ 0.006 | 0.711 $\pm$ 0.213 | 2.64 $\pm$ 0.047  | 3.77 $\pm$ 0.763  |
|                                                     | $\eta_v=0.3, \tau_c=4$ (X-Pool)  | 1.06 $\pm$ 0.510   | 0.101 $\pm$ 0.016 | 0.767 $\pm$ 0.522 | 2.29 $\pm$ 0.472  | 3.89 $\pm$ 1.02   |
|                                                     | $\eta_v=0.3, \tau_c=4$ (w/o pw)  | 0.377 $\pm$ 0.106  | 0.022 $\pm$ 0.007 | 1.19 $\pm$ 1.17   | 1.12 $\pm$ 0.115  | 3.34 $\pm$ 0.904  |
| Graph-UNets                                         | $h=5, n=9, \eta_v=0.3, \tau_c=4$ | 0.426 $\pm$ 0.223  | 0.062 $\pm$ 0.008 | 2.89 $\pm$ 1.89   | 0.767 $\pm$ 0.129 | 4.78 $\pm$ 1.94   |

Table 22: Graph Theory Benchmark results on Caterpillar graphs, all results are obtained using our codebase.

| Category                                            | Model                            | SP <sub>sssd</sub> | MCC               | Diameter          | SP <sub>ss</sub>  | ECC               |
|-----------------------------------------------------|----------------------------------|--------------------|-------------------|-------------------|-------------------|-------------------|
| Baselines<br>( $h=1$ )                              | $n=1$                            | 24.24 $\pm$ 1.57   | 1.25 $\pm$ 0.082  | 28.62 $\pm$ 2.55  | 19.08 $\pm$ 0.208 | 35.32 $\pm$ 0.462 |
|                                                     | $n=5$                            | 8.32 $\pm$ 2.10    | 0.561 $\pm$ 0.070 | 4.59 $\pm$ 0.346  | 9.62 $\pm$ 0.357  | 37.01 $\pm$ 1.48  |
|                                                     | $n=10$                           | 6.40 $\pm$ 0.652   | 0.630 $\pm$ 0.127 | 5.06 $\pm$ 0.499  | 4.06 $\pm$ 0.297  | 37.87 $\pm$ 3.22  |
| MeGraph( $h=5$ )                                    | $n=1$                            | 5.04 $\pm$ 1.03    | 0.685 $\pm$ 0.077 | 6.08 $\pm$ 1.40   | 5.40 $\pm$ 0.843  | 28.52 $\pm$ 2.16  |
| EdgePool( $\tau_c=2$ )                              | $n=5$                            | 3.44 $\pm$ 1.13    | 0.533 $\pm$ 0.064 | 2.00 $\pm$ 1.28   | 0.921 $\pm$ 0.149 | 5.20 $\pm$ 1.57   |
| MeGraph<br>S-EdgePool<br>Variants<br>( $h=5, n=5$ ) | $\tau_c=3$                       | 2.47 $\pm$ 0.529   | 0.607 $\pm$ 0.081 | 0.591 $\pm$ 0.172 | 0.574 $\pm$ 0.073 | 1.21 $\pm$ 0.148  |
|                                                     | $\eta_v=0.3$                     | 3.61 $\pm$ 1.36    | 0.582 $\pm$ 0.052 | 0.578 $\pm$ 0.231 | 1.69 $\pm$ 0.572  | 1.95 $\pm$ 0.322  |
|                                                     | $\eta_v=0.3, \tau_c=4$           | 1.59 $\pm$ 0.444   | 0.535 $\pm$ 0.091 | 0.317 $\pm$ 0.104 | 0.474 $\pm$ 0.170 | 1.32 $\pm$ 0.272  |
|                                                     | $\eta_v=0.5, \tau_c=4$           | 2.00 $\pm$ 0.648   | 0.514 $\pm$ 0.040 | 1.10 $\pm$ 0.288  | 0.986 $\pm$ 0.130 | 2.11 $\pm$ 0.766  |
|                                                     | $\eta_v=0.3, \tau_c=4$ (X-Pool)  | 1.39 $\pm$ 0.478   | 0.602 $\pm$ 0.110 | 0.736 $\pm$ 0.230 | 1.78 $\pm$ 0.254  | 3.36 $\pm$ 0.873  |
|                                                     | $\eta_v=0.3, \tau_c=4$ (w/o pw)  | 1.82 $\pm$ 0.627   | 0.628 $\pm$ 0.093 | 0.604 $\pm$ 0.067 | 0.797 $\pm$ 0.299 | 2.25 $\pm$ 0.230  |
| Graph-UNets                                         | $h=5, n=9, \eta_v=0.3, \tau_c=4$ | 1.57 $\pm$ 0.670   | 0.679 $\pm$ 0.098 | 3.18 $\pm$ 0.583  | 0.976 $\pm$ 0.270 | 3.83 $\pm$ 1.06   |

Table 23: Graph Theory Benchmark results on Lobster graphs, all results are obtained using our codebase.

| Category                                            | Model                            | SP <sub>sssd</sub> | MCC               | Diameter          | SP <sub>ss</sub>  | ECC               |
|-----------------------------------------------------|----------------------------------|--------------------|-------------------|-------------------|-------------------|-------------------|
| Baselines<br>( $h=1$ )                              | $n=1$                            | 23.92 $\pm$ 0.319  | 1.06 $\pm$ 0.166  | 11.93 $\pm$ 1.32  | 38.44 $\pm$ 0.065 | 40.46 $\pm$ 0.350 |
|                                                     | $n=5$                            | 10.89 $\pm$ 1.47   | 0.544 $\pm$ 0.067 | 3.66 $\pm$ 0.424  | 20.12 $\pm$ 0.105 | 28.81 $\pm$ 1.14  |
|                                                     | $n=10$                           | 7.35 $\pm$ 2.50    | 0.631 $\pm$ 0.067 | 2.59 $\pm$ 0.517  | 10.52 $\pm$ 0.619 | 28.47 $\pm$ 1.65  |
| MeGraph( $h=5$ )                                    | $n=1$                            | 6.00 $\pm$ 1.82    | 0.785 $\pm$ 0.062 | 4.35 $\pm$ 1.51   | 13.75 $\pm$ 0.675 | 30.49 $\pm$ 2.18  |
| EdgePool( $\tau_c=2$ )                              | $n=5$                            | 1.93 $\pm$ 0.861   | 0.543 $\pm$ 0.073 | 1.07 $\pm$ 0.114  | 2.05 $\pm$ 0.393  | 11.39 $\pm$ 5.43  |
| MeGraph<br>S-EdgePool<br>Variants<br>( $h=5, n=5$ ) | $\tau_c=3$                       | 2.02 $\pm$ 0.791   | 0.447 $\pm$ 0.123 | 0.705 $\pm$ 0.133 | 1.66 $\pm$ 0.270  | 2.23 $\pm$ 0.378  |
|                                                     | $\eta_v=0.3$                     | 6.01 $\pm$ 1.52    | 0.521 $\pm$ 0.028 | 0.707 $\pm$ 0.202 | 3.04 $\pm$ 0.250  | 2.70 $\pm$ 0.212  |
|                                                     | $\eta_v=0.3, \tau_c=4$           | 1.90 $\pm$ 0.449   | 0.489 $\pm$ 0.069 | 0.671 $\pm$ 0.165 | 1.30 $\pm$ 0.106  | 2.62 $\pm$ 0.849  |
|                                                     | $\eta_v=0.5, \tau_c=4$           | 3.27 $\pm$ 0.716   | 0.451 $\pm$ 0.090 | 0.941 $\pm$ 0.324 | 2.82 $\pm$ 0.803  | 4.04 $\pm$ 0.527  |
|                                                     | $\eta_v=0.3, \tau_c=4$ (X-Pool)  | 2.67 $\pm$ 0.486   | 0.494 $\pm$ 0.109 | 1.01 $\pm$ 0.194  | 2.79 $\pm$ 0.343  | 4.16 $\pm$ 0.886  |
|                                                     | $\eta_v=0.3, \tau_c=4$ (w/o pw)  | 1.85 $\pm$ 0.432   | 0.473 $\pm$ 0.069 | 0.892 $\pm$ 0.277 | 1.77 $\pm$ 0.329  | 4.33 $\pm$ 1.71   |
| Graph-UNets                                         | $h=5, n=9, \eta_v=0.3, \tau_c=4$ | 4.85 $\pm$ 1.48    | 0.782 $\pm$ 0.026 | 3.74 $\pm$ 0.361  | 2.96 $\pm$ 0.443  | 4.25 $\pm$ 0.544  |

Table 24: Graph Theory Benchmark results on Cycle graphs, all results are obtained using our codebase.

| Category                                            | Model                            | SP <sub>sssd</sub> | MCC               | Diameter          | SP <sub>ss</sub>  | ECC               |
|-----------------------------------------------------|----------------------------------|--------------------|-------------------|-------------------|-------------------|-------------------|
| Baselines<br>( $h=1$ )                              | $n=1$                            | 18.75 $\pm$ 0.066  | 0.534 $\pm$ 0.022 | 22.35 $\pm$ 0.149 | 24.07 $\pm$ 0.009 | 21.47 $\pm$ 0.060 |
|                                                     | $n=5$                            | 3.39 $\pm$ 0.304   | 0.027 $\pm$ 0.001 | 25.11 $\pm$ 0.325 | 12.44 $\pm$ 1.05  | 21.81 $\pm$ 0.102 |
|                                                     | $n=10$                           | 0.352 $\pm$ 0.060  | 0.011 $\pm$ 0.003 | 26.54 $\pm$ 1.16  | 8.65 $\pm$ 1.02   | 24.09 $\pm$ 0.360 |
| MeGraph( $h=5$ )                                    | $n=1$                            | 0.594 $\pm$ 0.212  | 0.074 $\pm$ 0.029 | 9.11 $\pm$ 1.88   | 4.07 $\pm$ 0.364  | 21.53 $\pm$ 0.070 |
| EdgePool( $\tau_c=2$ )                              | $n=5$                            | 0.060 $\pm$ 0.032  | 0.014 $\pm$ 0.003 | 13.44 $\pm$ 6.40  | 0.103 $\pm$ 0.016 | 24.05 $\pm$ 0.204 |
| MeGraph<br>S-EdgePool<br>Variants<br>( $h=5, n=5$ ) | $\tau_c=3$                       | 0.066 $\pm$ 0.036  | 0.015 $\pm$ 0.006 | 0.241 $\pm$ 0.049 | 0.090 $\pm$ 0.037 | 0.342 $\pm$ 0.186 |
|                                                     | $\eta_v=0.3$                     | 2.45 $\pm$ 0.873   | 0.015 $\pm$ 0.001 | 0.709 $\pm$ 0.226 | 8.36 $\pm$ 0.261  | 0.488 $\pm$ 0.267 |
|                                                     | $\eta_v=0.3, \tau_c=4$           | 0.060 $\pm$ 0.030  | 0.019 $\pm$ 0.003 | 0.312 $\pm$ 0.236 | 0.226 $\pm$ 0.050 | 0.562 $\pm$ 0.209 |
|                                                     | $\eta_v=0.5, \tau_c=4$           | 0.451 $\pm$ 0.203  | 0.014 $\pm$ 0.004 | 0.252 $\pm$ 0.124 | 1.05 $\pm$ 0.524  | 4.30 $\pm$ 1.90   |
|                                                     | $\eta_v=0.3, \tau_c=4$ (X-Pool)  | 0.494 $\pm$ 0.292  | 0.096 $\pm$ 0.028 | 0.468 $\pm$ 0.220 | 1.08 $\pm$ 0.130  | 0.860 $\pm$ 0.292 |
|                                                     | $\eta_v=0.3, \tau_c=4$ (w/o pw)  | 0.159 $\pm$ 0.209  | 0.017 $\pm$ 0.008 | 1.23 $\pm$ 0.928  | 0.461 $\pm$ 0.118 | 8.26 $\pm$ 3.70   |
| Graph-UNets                                         | $h=5, n=9, \eta_v=0.3, \tau_c=4$ | 0.144 $\pm$ 0.073  | 0.035 $\pm$ 0.010 | 3.21 $\pm$ 0.893  | 0.439 $\pm$ 0.089 | 5.91 $\pm$ 1.31   |

Table 25: Graph Theory Benchmark results on Pseudotree graphs, all results are obtained using our codebase.

| Category                                            | Model                            | SP <sub>sssd</sub> | MCC               | Diameter          | SP <sub>ss</sub>  | ECC               |
|-----------------------------------------------------|----------------------------------|--------------------|-------------------|-------------------|-------------------|-------------------|
| Baselines<br>( $h=1$ )                              | $n=1$                            | 1.93 $\pm$ 0.239   | 1.71 $\pm$ 0.281  | 2.78 $\pm$ 0.098  | 6.27 $\pm$ 0.004  | 4.23 $\pm$ 0.034  |
|                                                     | $n=5$                            | 0.061 $\pm$ 0.024  | 0.942 $\pm$ 0.094 | 1.74 $\pm$ 0.299  | 1.54 $\pm$ 0.006  | 4.15 $\pm$ 0.086  |
|                                                     | $n=10$                           | 0.037 $\pm$ 0.022  | 0.775 $\pm$ 0.094 | 1.84 $\pm$ 0.260  | 0.126 $\pm$ 0.038 | 4.06 $\pm$ 0.037  |
| MeGraph( $h=5$ )                                    | $n=1$                            | 0.404 $\pm$ 0.096  | 1.75 $\pm$ 0.133  | 1.50 $\pm$ 0.494  | 2.25 $\pm$ 0.280  | 3.97 $\pm$ 0.270  |
| EdgePool( $\tau_c=2$ )                              | $n=5$                            | 0.141 $\pm$ 0.022  | 0.999 $\pm$ 0.054 | 1.16 $\pm$ 0.069  | 0.148 $\pm$ 0.034 | 3.12 $\pm$ 0.202  |
| MeGraph<br>S-EdgePool<br>Variants<br>( $h=5, n=5$ ) | $\tau_c=3$                       | 0.130 $\pm$ 0.069  | 0.912 $\pm$ 0.073 | 0.669 $\pm$ 0.080 | 0.115 $\pm$ 0.015 | 0.797 $\pm$ 0.079 |
|                                                     | $\eta_v=0.3$                     | 0.048 $\pm$ 0.030  | 0.839 $\pm$ 0.077 | 0.758 $\pm$ 0.134 | 0.246 $\pm$ 0.021 | 0.838 $\pm$ 0.023 |
|                                                     | $\eta_v=0.3, \tau_c=4$           | 0.106 $\pm$ 0.054  | 0.814 $\pm$ 0.092 | 0.663 $\pm$ 0.076 | 0.133 $\pm$ 0.028 | 0.845 $\pm$ 0.101 |
|                                                     | $\eta_v=0.5, \tau_c=4$           | 0.071 $\pm$ 0.048  | 1.03 $\pm$ 0.186  | 0.583 $\pm$ 0.065 | 0.171 $\pm$ 0.038 | 0.868 $\pm$ 0.034 |
|                                                     | $\eta_v=0.3, \tau_c=4$ (X-Pool)  | 0.564 $\pm$ 0.155  | 0.966 $\pm$ 0.172 | 0.977 $\pm$ 0.054 | 0.611 $\pm$ 0.065 | 1.10 $\pm$ 0.036  |
|                                                     | $\eta_v=0.3, \tau_c=4$ (w/o pw)  | 0.080 $\pm$ 0.033  | 0.971 $\pm$ 0.072 | 0.956 $\pm$ 0.230 | 0.276 $\pm$ 0.017 | 1.13 $\pm$ 0.321  |
| Graph-UNets                                         | $h=5, n=9, \eta_v=0.3, \tau_c=4$ | 0.467 $\pm$ 0.065  | 1.09 $\pm$ 0.072  | 1.71 $\pm$ 0.295  | 0.721 $\pm$ 0.092 | 2.25 $\pm$ 0.327  |

Table 26: Graph Theory Benchmark results on Geo graphs, all results are obtained using our codebase.

| Category                                            | Model                            | SP <sub>sssd</sub> | MCC               | Diameter          | SP <sub>ss</sub>  | ECC               |
|-----------------------------------------------------|----------------------------------|--------------------|-------------------|-------------------|-------------------|-------------------|
| Baselines<br>( $h=1$ )                              | $n=1$                            | 5.79 $\pm$ 0.630   | 0.424 $\pm$ 0.023 | 11.85 $\pm$ 0.391 | 12.49 $\pm$ 0.035 | 14.82 $\pm$ 0.056 |
|                                                     | $n=5$                            | 1.02 $\pm$ 0.772   | 0.407 $\pm$ 0.040 | 8.37 $\pm$ 0.468  | 5.10 $\pm$ 0.435  | 14.33 $\pm$ 0.079 |
|                                                     | $n=10$                           | 0.304 $\pm$ 0.125  | 0.404 $\pm$ 0.061 | 9.41 $\pm$ 0.759  | 0.803 $\pm$ 0.162 | 14.33 $\pm$ 0.136 |
| MeGraph( $h=5$ )                                    | $n=1$                            | 1.60 $\pm$ 0.880   | 0.347 $\pm$ 0.033 | 10.17 $\pm$ 2.04  | 4.87 $\pm$ 0.777  | 11.91 $\pm$ 0.451 |
| EdgePool( $\tau_c=2$ )                              | $n=5$                            | 0.232 $\pm$ 0.061  | 0.273 $\pm$ 0.018 | 2.70 $\pm$ 0.288  | 0.575 $\pm$ 0.127 | 6.92 $\pm$ 2.36   |
| MeGraph<br>S-EdgePool<br>Variants<br>( $h=5, n=5$ ) | $\tau_c=3$                       | 0.188 $\pm$ 0.100  | 0.288 $\pm$ 0.020 | 2.04 $\pm$ 0.225  | 0.562 $\pm$ 0.186 | 2.42 $\pm$ 0.333  |
|                                                     | $\eta_v=0.3$                     | 1.38 $\pm$ 0.617   | 0.330 $\pm$ 0.025 | 4.40 $\pm$ 1.15   | 1.37 $\pm$ 0.083  | 5.45 $\pm$ 0.465  |
|                                                     | $\eta_v=0.3, \tau_c=4$           | 0.230 $\pm$ 0.070  | 0.231 $\pm$ 0.034 | 1.99 $\pm$ 0.549  | 0.454 $\pm$ 0.057 | 2.69 $\pm$ 0.369  |
|                                                     | $\eta_v=0.5, \tau_c=4$           | 0.374 $\pm$ 0.148  | 0.368 $\pm$ 0.043 | 3.95 $\pm$ 0.319  | 0.777 $\pm$ 0.122 | 4.61 $\pm$ 0.717  |
|                                                     | $\eta_v=0.3, \tau_c=4$ (X-Pool)  | 1.04 $\pm$ 0.502   | 0.362 $\pm$ 0.031 | 2.32 $\pm$ 0.440  | 2.37 $\pm$ 0.260  | 5.08 $\pm$ 0.737  |
|                                                     | $\eta_v=0.3, \tau_c=4$ (w/o pw)  | 0.233 $\pm$ 0.046  | 0.261 $\pm$ 0.035 | 2.58 $\pm$ 0.617  | 1.09 $\pm$ 0.226  | 4.85 $\pm$ 0.805  |
| Graph-UNets                                         | $h=5, n=9, \eta_v=0.3, \tau_c=4$ | 1.49 $\pm$ 0.451   | 0.400 $\pm$ 0.020 | 4.63 $\pm$ 0.647  | 2.42 $\pm$ 0.458  | 7.36 $\pm$ 1.62   |



Table 27: Graph Theory Benchmark results on BA graphs, all results are obtained using our codebase.

| Category                                            | Model                            | SP <sub>sssd</sub> | MCC              | Diameter          | SP <sub>ss</sub> | ECC                |
|-----------------------------------------------------|----------------------------------|--------------------|------------------|-------------------|------------------|--------------------|
| Baselines<br>( $h=1$ )                              | $n=1$                            | 0.004 $\pm$ 0.001  | 2.81 $\pm$ 0.142 | 0.092 $\pm$ 0.021 | —                | 0.128 $\pm$ 0.006  |
|                                                     | $n=5$                            | 0.007 $\pm$ 0.002  | 3.65 $\pm$ 0.660 | 0.098 $\pm$ 0.014 | —                | 0.091 $\pm$ 0.011  |
|                                                     | $n=10$                           | 0.011 $\pm$ 0.006  | 3.72 $\pm$ 0.376 | 0.122 $\pm$ 0.038 | —                | 0.080 $\pm$ 0.004  |
| MeGraph( $h=5$ )                                    | $n=1$                            | 0.006 $\pm$ 0.004  | 2.00 $\pm$ 0.380 | 0.101 $\pm$ 0.020 | —                | 0.084 $\pm$ 0.017  |
| EdgePool( $\tau_c=2$ )                              | $n=5$                            | 0.003 $\pm$ 0.001  | 2.00 $\pm$ 0.240 | 0.104 $\pm$ 0.011 | —                | 0.052 $\pm$ 0.010  |
| MeGraph<br>S-EdgePool<br>Variants<br>( $h=5, n=5$ ) | $\tau_c=3$                       | 0.007 $\pm$ 0.003  | 1.77 $\pm$ 0.403 | 0.089 $\pm$ 0.008 | —                | 0.126 $\pm$ 0.027  |
|                                                     | $\eta_v=0.3$                     | 0.013 $\pm$ 0.004  | 1.67 $\pm$ 0.333 | 0.084 $\pm$ 0.008 | —                | 0.086 $\pm$ 0.005  |
|                                                     | $\eta_v=0.3, \tau_c=4$           | 0.011 $\pm$ 0.005  | 1.42 $\pm$ 0.252 | 0.073 $\pm$ 0.015 | —                | 0.163 $\pm$ 0.007  |
|                                                     | $\eta_v=0.5, \tau_c=4$           | 0.008 $\pm$ 0.004  | 1.71 $\pm$ 0.403 | 0.074 $\pm$ 0.009 | —                | 0.156 $\pm$ 0.021  |
|                                                     | $\eta_v=0.3, \tau_c=4$ (X-Pool)  | 0.009 $\pm$ 0.003  | 1.22 $\pm$ 0.242 | 0.088 $\pm$ 0.021 | —                | 0.076 $\pm$ 0.006  |
|                                                     | $\eta_v=0.3, \tau_c=4$ (w/o pw)  | 0.009 $\pm$ 0.003  | 1.42 $\pm$ 0.209 | 0.068 $\pm$ 0.017 | —                | 0.068 $\pm$ 0.017  |
| Graph-UNets                                         | $h=5, n=9, \eta_v=0.3, \tau_c=4$ | 0.024 $\pm$ 0.009  | 2.84 $\pm$ 0.777 | 0.091 $\pm$ 0.01  | —                | 0.179 $\pm$ 0.0227 |

Table 28: Graph Theory Benchmark results on mixed, ER, Caveman and Star graphs, all results are obtained using our codebase.

| Category                                            | Model                            | MCC               |                   |                   |                   | ECC               |                   |
|-----------------------------------------------------|----------------------------------|-------------------|-------------------|-------------------|-------------------|-------------------|-------------------|
|                                                     |                                  | mix               | ER                | Caveman           | Star              | mix               | ER                |
| Baselines<br>( $h=1$ )                              | $n=1$                            | 3.46 $\pm$ 0.211  | 2.91 $\pm$ 0.206  | 0.015 $\pm$ 0.004 | 0.144 $\pm$ 0.031 | 0.316 $\pm$ 0.003 | 0.346 $\pm$ 0.006 |
|                                                     | $n=5$                            | 3.29 $\pm$ 0.261  | 3.35 $\pm$ 0.205  | 0.014 $\pm$ 0.003 | 0.078 $\pm$ 0.021 | 0.228 $\pm$ 0.008 | 0.289 $\pm$ 0.008 |
|                                                     | $n=10$                           | 3.51 $\pm$ 0.323  | 3.53 $\pm$ 0.375  | 0.018 $\pm$ 0.006 | 0.065 $\pm$ 0.005 | 0.212 $\pm$ 0.008 | 0.414 $\pm$ 0.102 |
| MeGraph( $h=5$ )                                    | $n=1$                            | 1.25 $\pm$ 0.167  | 0.749 $\pm$ 0.058 | 0.018 $\pm$ 0.005 | 0.135 $\pm$ 0.055 | 0.150 $\pm$ 0.011 | 0.320 $\pm$ 0.071 |
| EdgePool( $\tau_c=2$ )                              | $n=5$                            | 1.11 $\pm$ 0.143  | 0.723 $\pm$ 0.073 | 0.017 $\pm$ 0.005 | 0.052 $\pm$ 0.017 | 0.125 $\pm$ 0.010 | 0.345 $\pm$ 0.064 |
| MeGraph<br>S-EdgePool<br>Variants<br>( $h=5, n=5$ ) | $\tau_c=3$                       | 1.07 $\pm$ 0.034  | 0.714 $\pm$ 0.039 | 0.017 $\pm$ 0.002 | 0.072 $\pm$ 0.016 | 0.137 $\pm$ 0.013 | 0.232 $\pm$ 0.035 |
|                                                     | $\eta_v=0.3$                     | 0.908 $\pm$ 0.153 | 0.627 $\pm$ 0.090 | 0.026 $\pm$ 0.007 | 0.125 $\pm$ 0.026 | 0.128 $\pm$ 0.014 | 0.248 $\pm$ 0.012 |
|                                                     | $\eta_v=0.3, \tau_c=4$           | 1.10 $\pm$ 0.085  | 0.709 $\pm$ 0.092 | 0.019 $\pm$ 0.004 | 0.073 $\pm$ 0.012 | 0.129 $\pm$ 0.009 | 0.224 $\pm$ 0.053 |
|                                                     | $\eta_v=0.5, \tau_c=4$           | 1.12 $\pm$ 0.219  | 0.722 $\pm$ 0.128 | 0.026 $\pm$ 0.008 | 0.058 $\pm$ 0.010 | 0.147 $\pm$ 0.017 | 0.219 $\pm$ 0.042 |
|                                                     | $\eta_v=0.3, \tau_c=4$ (X-Pool)  | 1.01 $\pm$ 0.166  | 0.838 $\pm$ 0.078 | 0.029 $\pm$ 0.007 | 0.107 $\pm$ 0.021 | 0.119 $\pm$ 0.008 | 0.213 $\pm$ 0.027 |
|                                                     | $\eta_v=0.3, \tau_c=4$ (w/o pw)  | 1.13 $\pm$ 0.059  | 0.622 $\pm$ 0.073 | 0.019 $\pm$ 0.003 | 0.075 $\pm$ 0.015 | 0.126 $\pm$ 0.016 | 0.307 $\pm$ 0.062 |
| Graph-UNets                                         | $h=5, n=9, \eta_v=0.3, \tau_c=4$ | 1.06 $\pm$ 0.171  | 0.859 $\pm$ 0.092 | 0.041 $\pm$ 0.007 | 0.057 $\pm$ 0.010 | 0.153 $\pm$ 0.012 | 0.345 $\pm$ 0.133 |
